# Supplementary material for: Cognitive discourse during a group quiz activity in a blended learning organic chemistry course
Source: publisher site journal article supplement (doi:10.1515/cti-2023-0007), 2023-08-16
Supplement: Supplementary file 1 [file j_cti-2023-0007_suppl_001.docx]

**Supplementary Material**

***Table S1. Coding of Interaction Levels***

| **Interaction Level** | **Code Description** |
| --- | --- |
| Low | - One student initiates all ideas. - Others accept without discussing /expanding. - Yes/No type questions. No why/how questions. - No addition to the discussion - No clarifying other students’ statements. - Generic agreement. - One student wrote. Others contribute none or little. |
| Medium | - One student is proposing ideas mostly. Others shallow contribution. - Other students are not expanding/opposing. - Restate/repeat. - Active engagement rather than passive. - Add some critical information. - Statements are discontinuous. - Few why/how questions. |
| High | - Why /How questions. - Equal amount of responses/statements - Each statement is built upon each other. - Expanding/elaborating/restating/rebuttal - Conclusions are jointly made. |

| 1. Define the anti conformation. 2. Draw a template to illustrate anti conformation of an alkane. 3. Compare the most stable anti and least stable eclipsed conformations of heptane for the rotation around the C3-C4 axis. 4. Draw the most stable anti-conformation of heptane for the rotation around the C3-C4 axis. 5. Explain the stability of the least stable eclipsed conformations of butane defined for the rotation around the C2-C3 axis in comparison to that of octane defined for the rotation around the C4-C5 axis. 6. Develop an analogy explaining why a molecule's stability will change as substituent size increases. |
| --- |

***Figure S1. All prompts for group quiz 2***


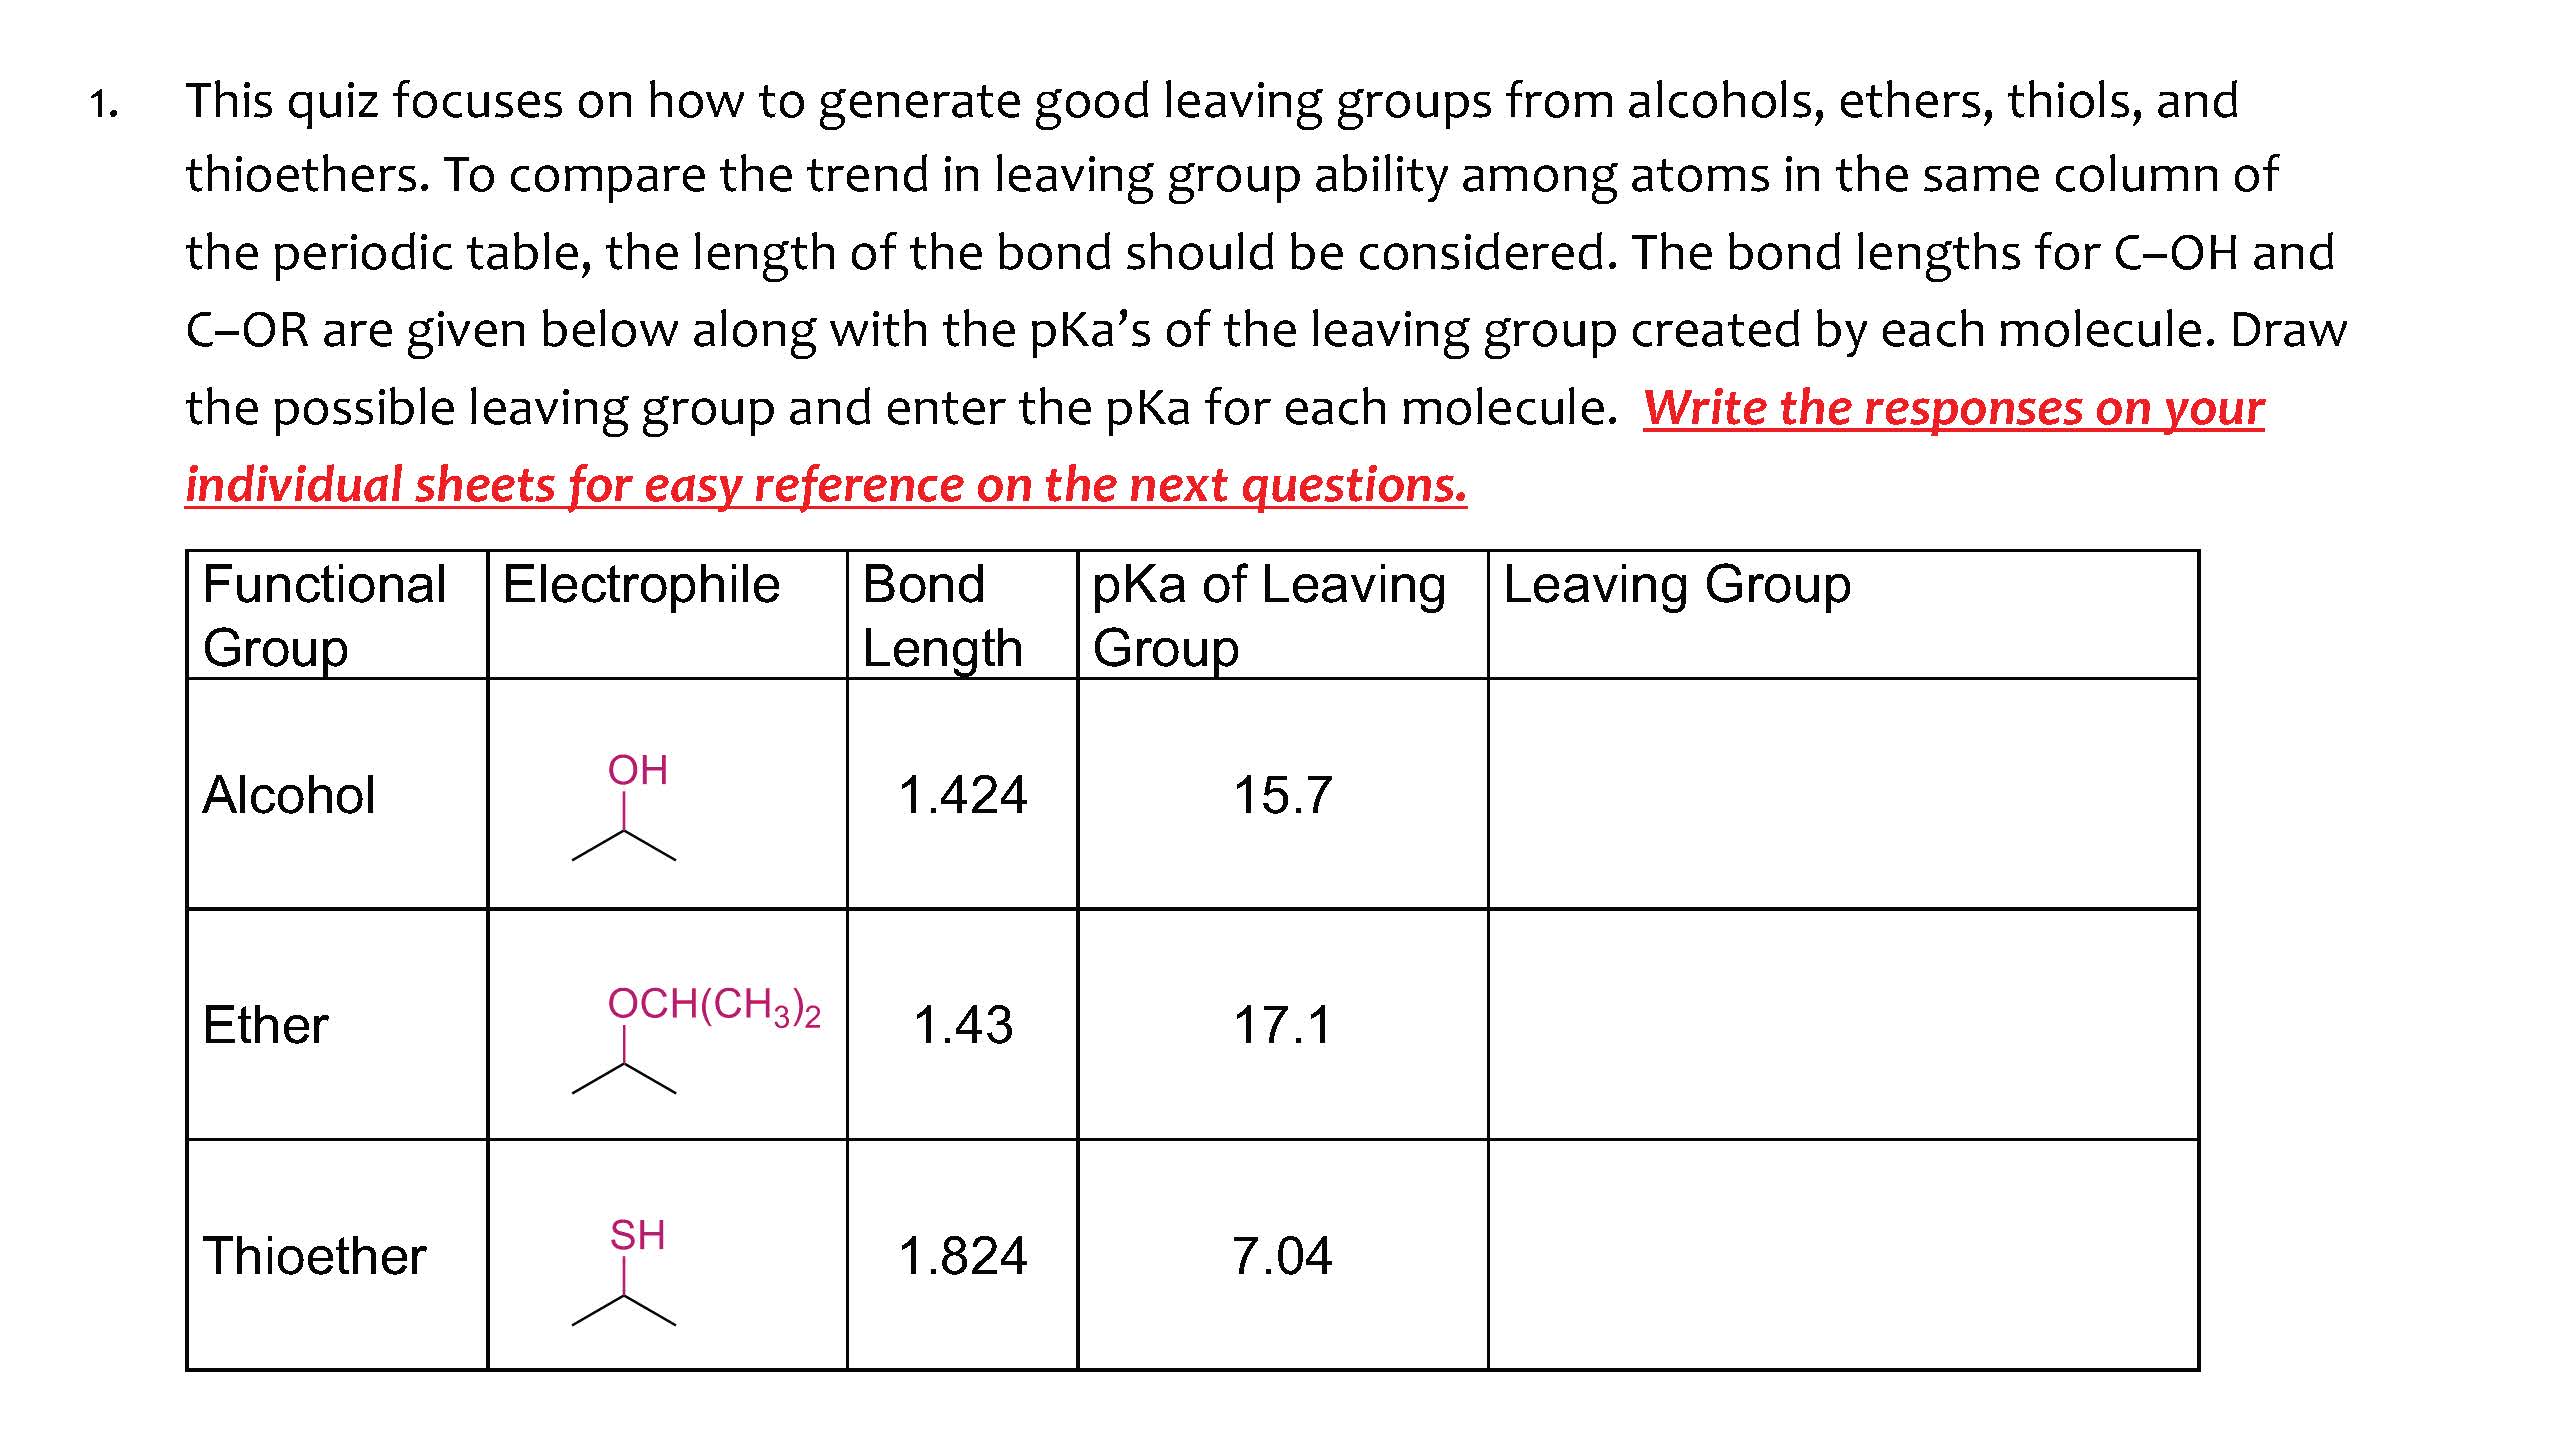

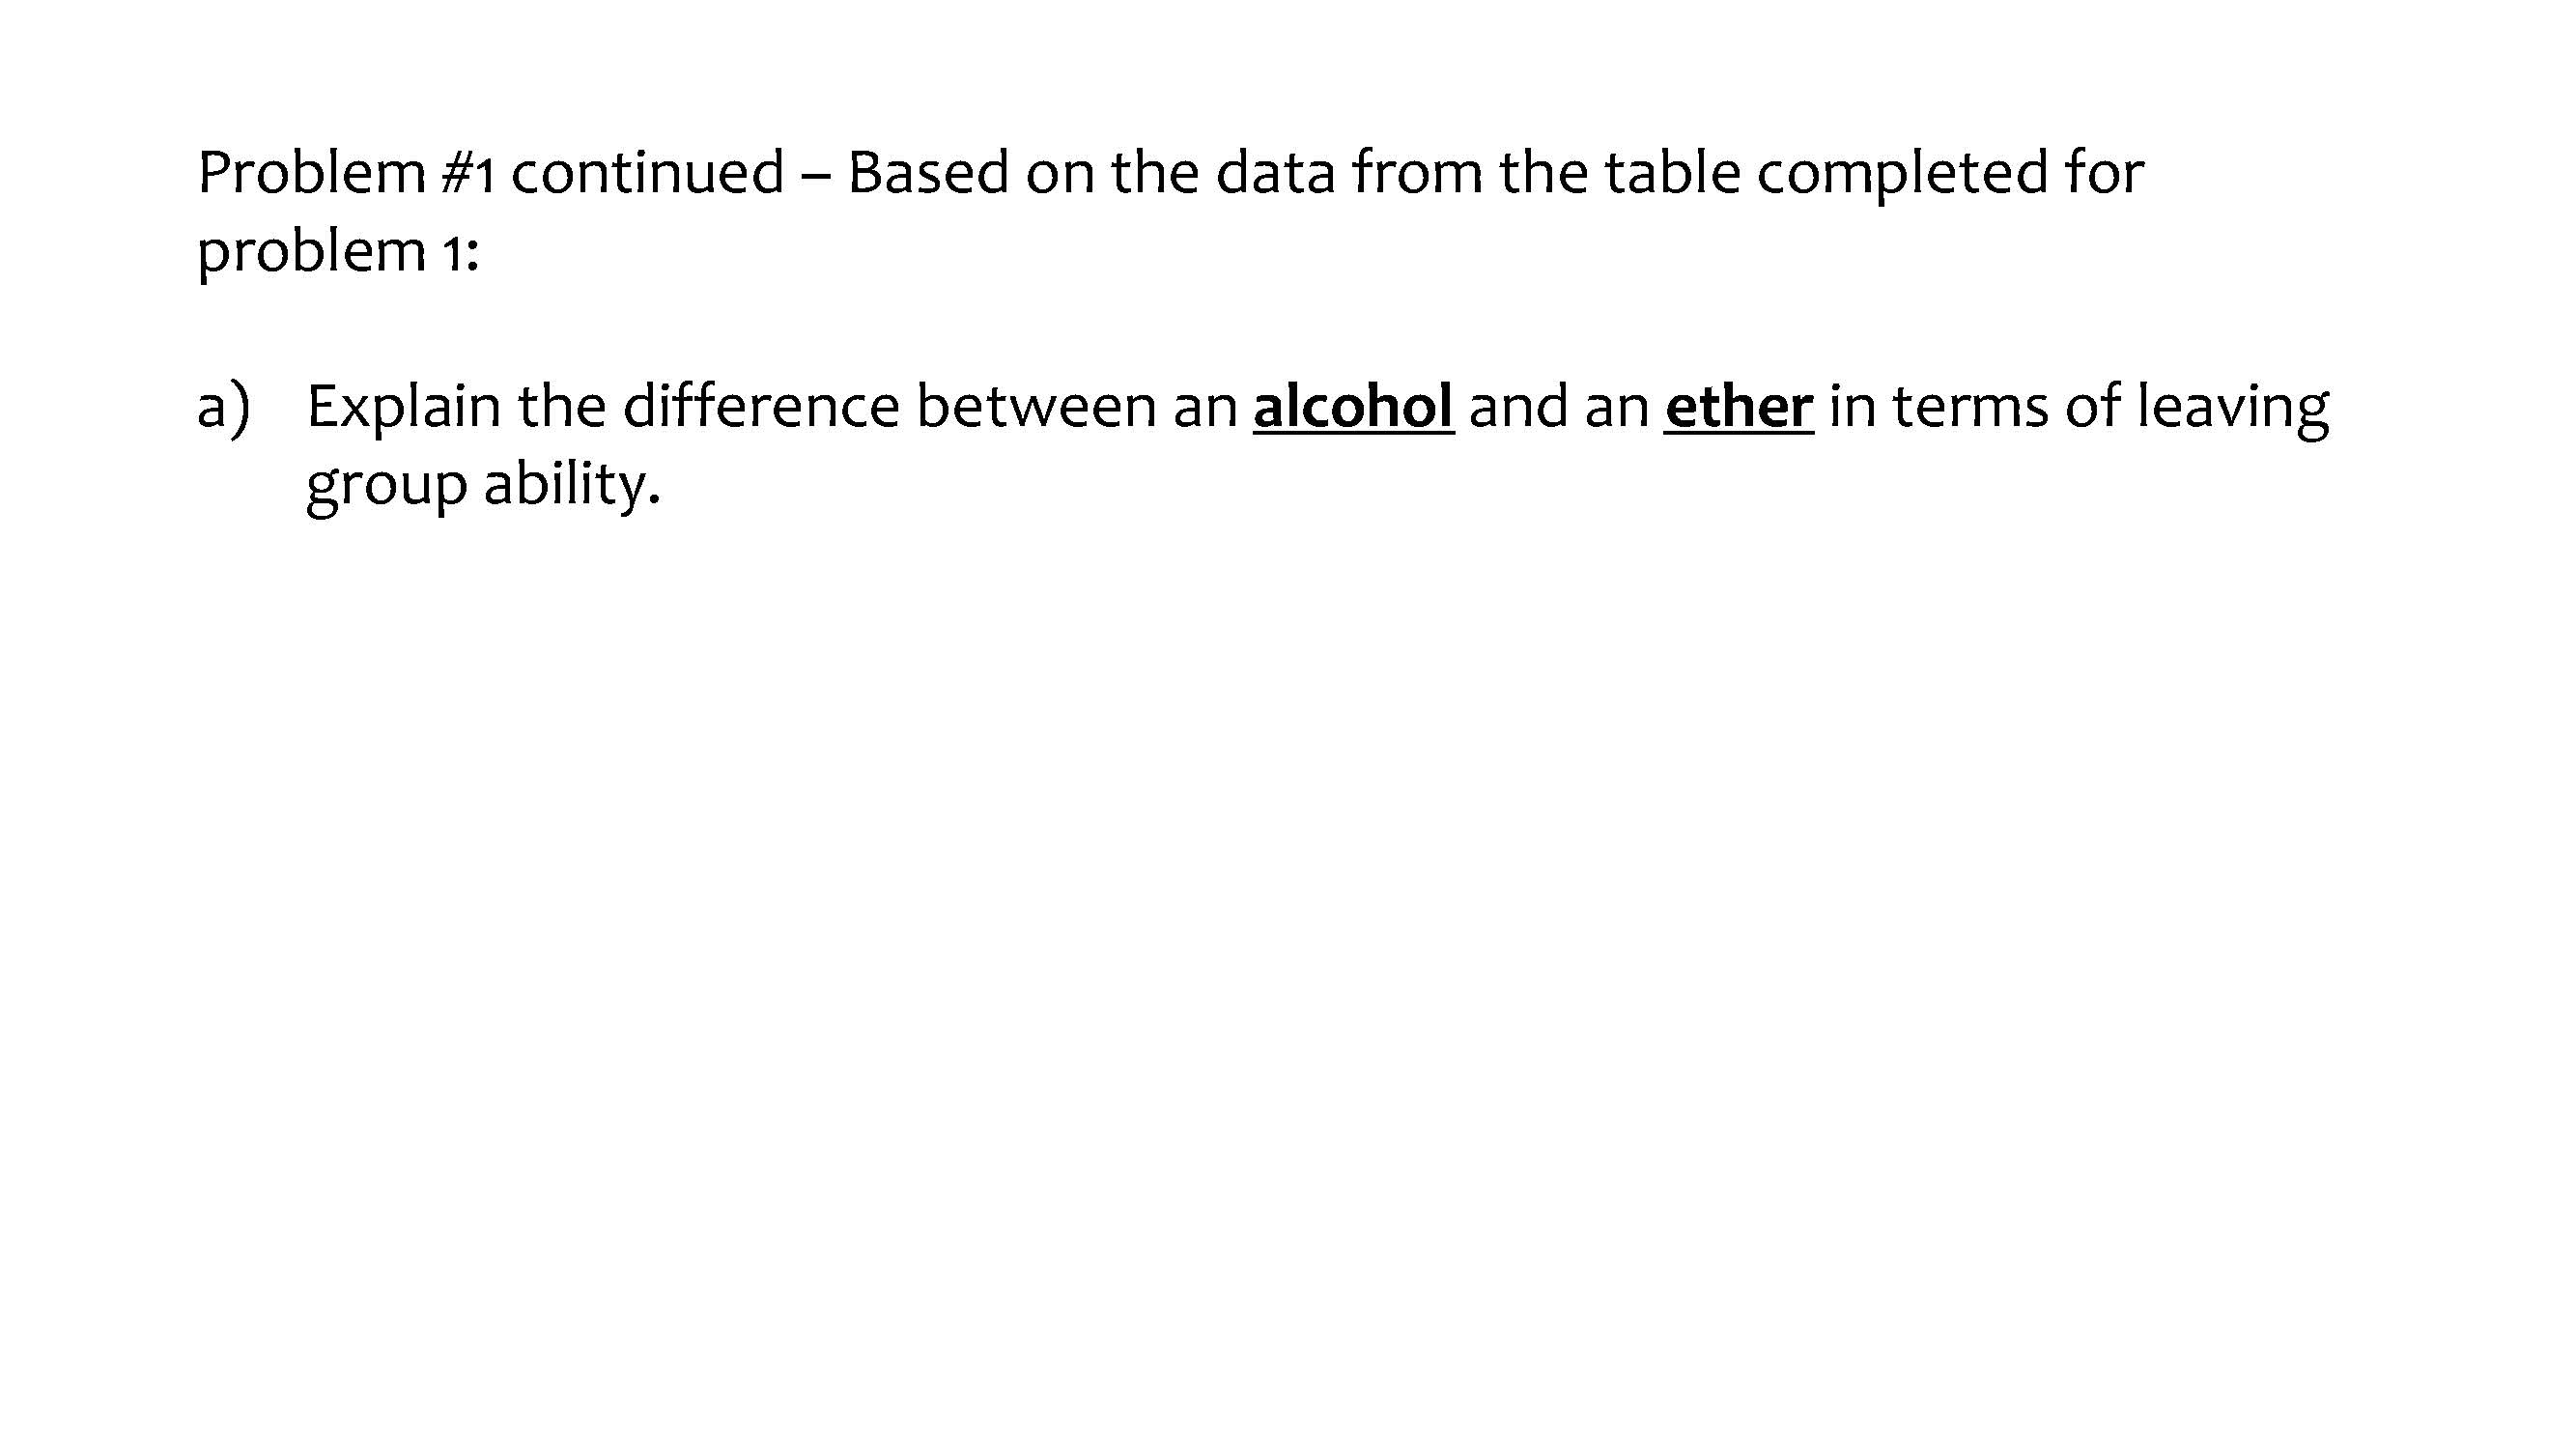


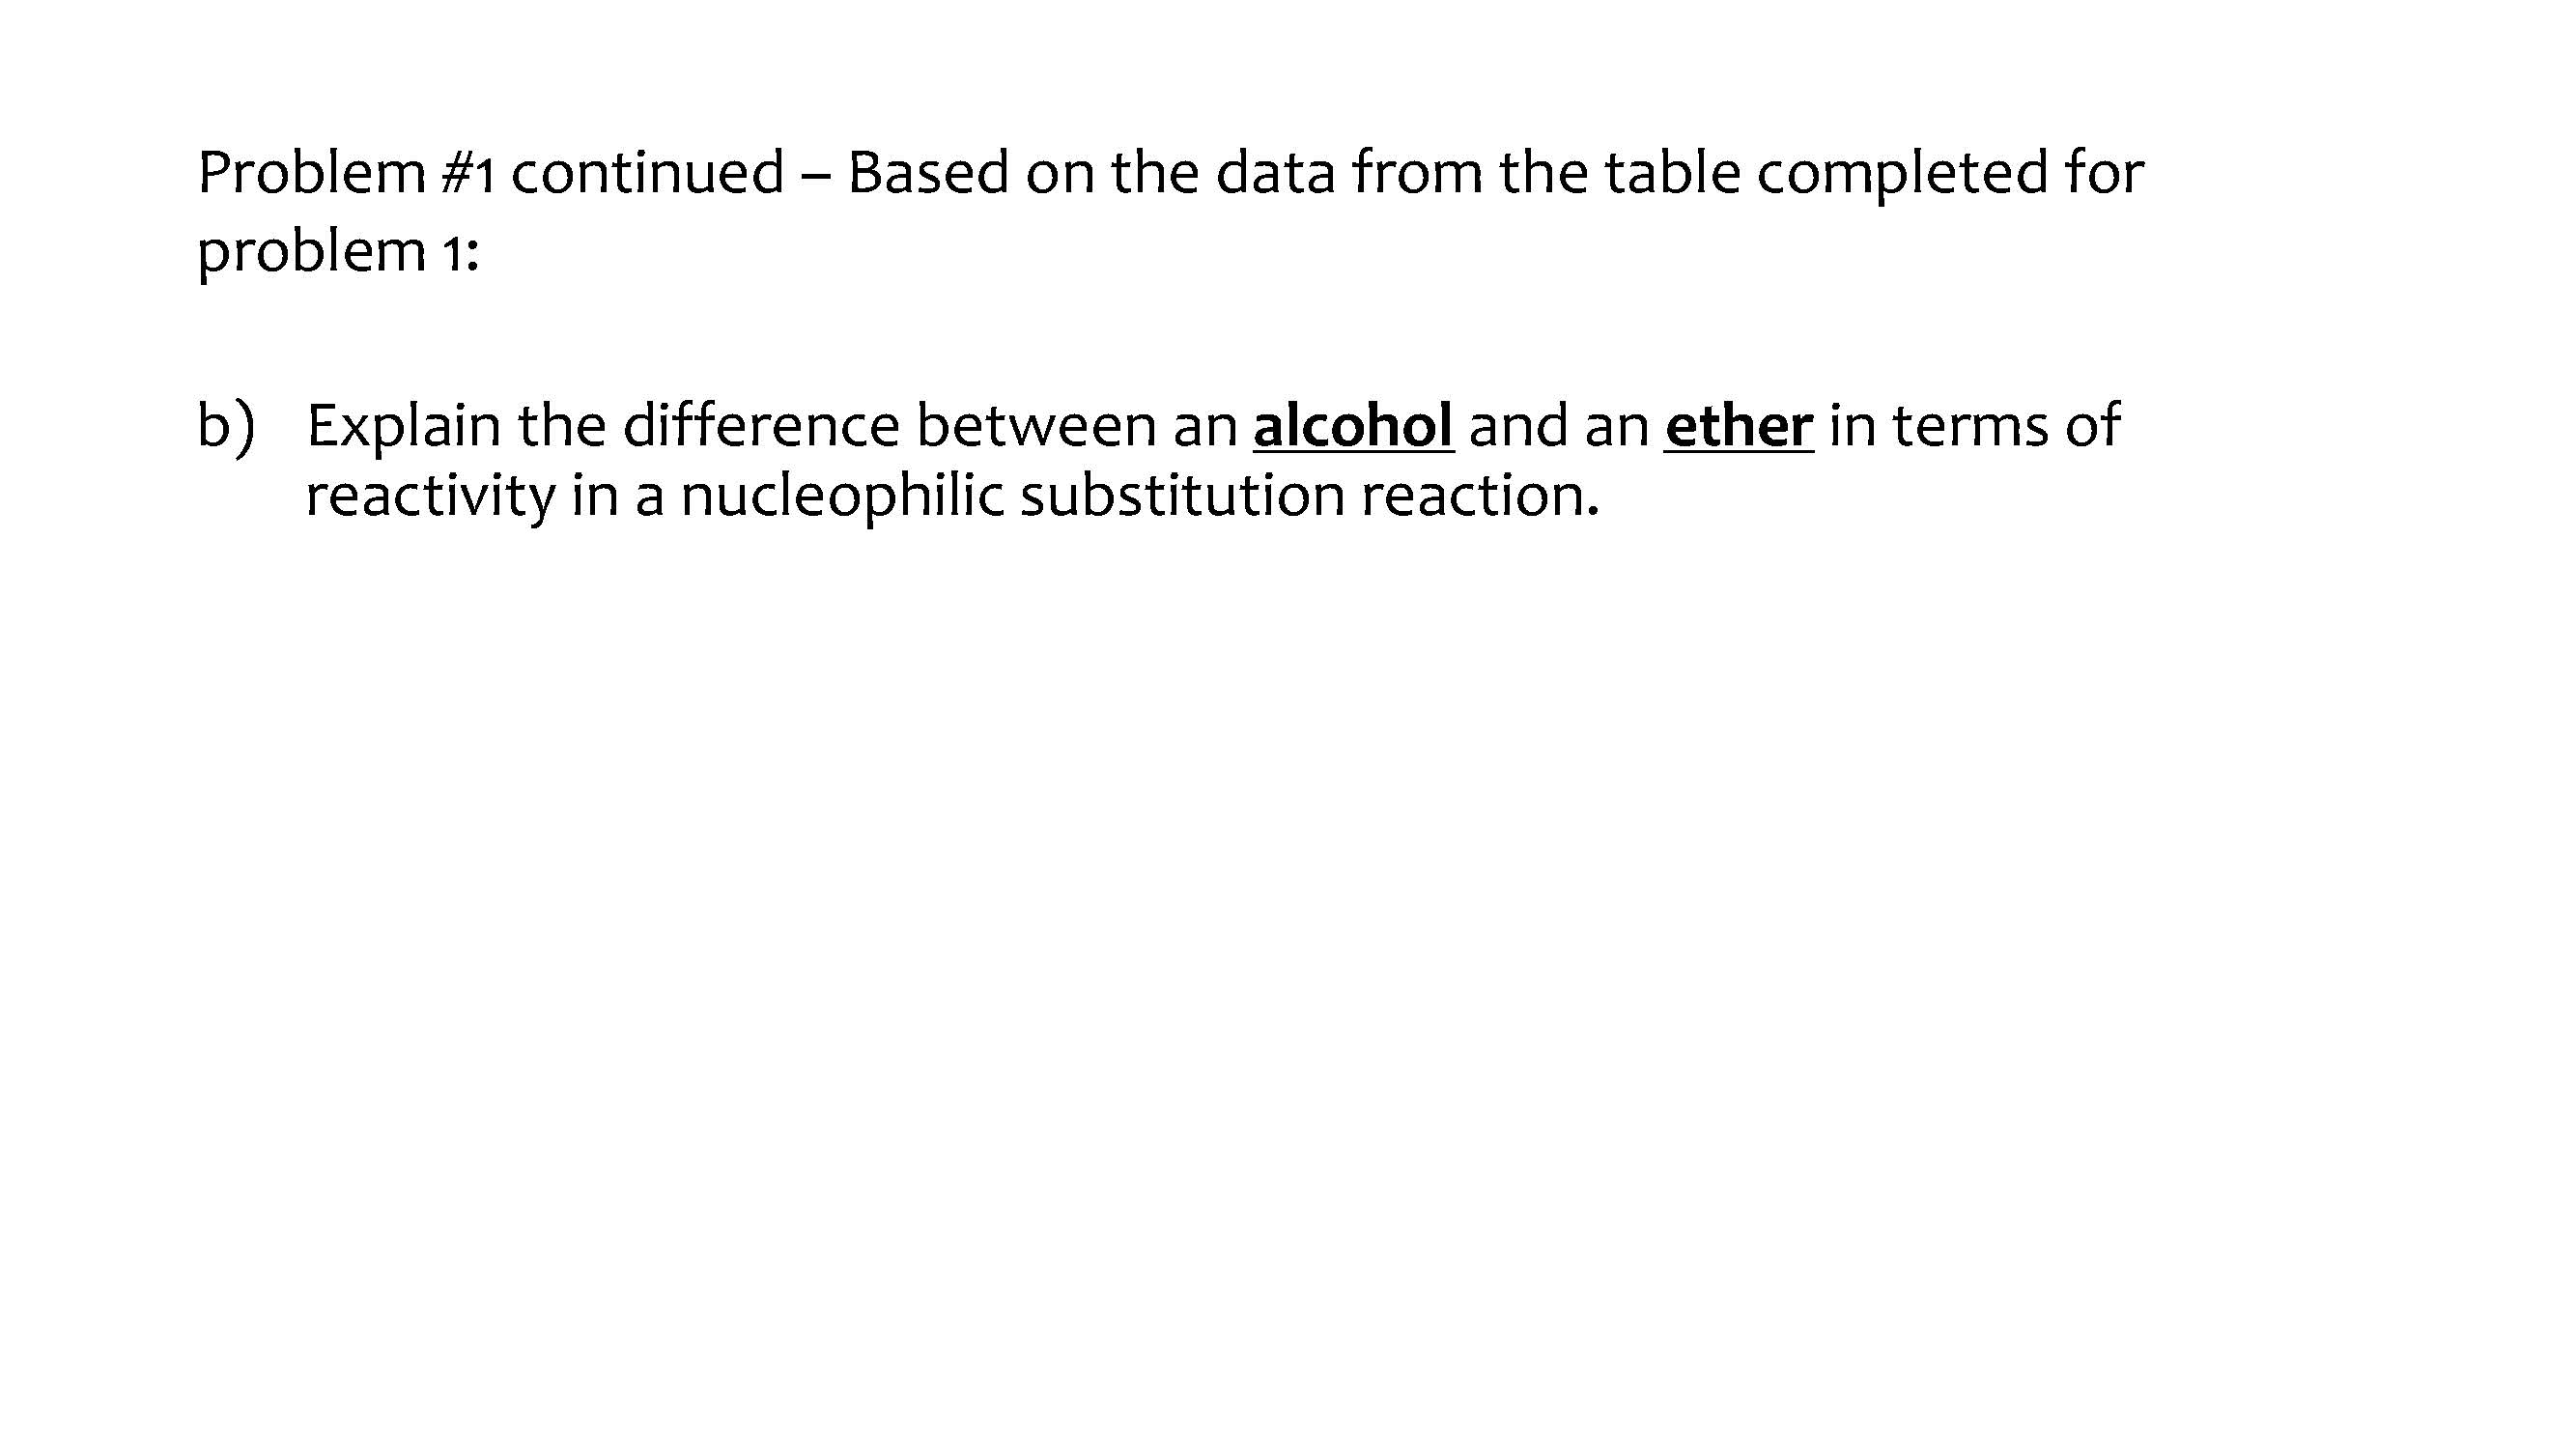

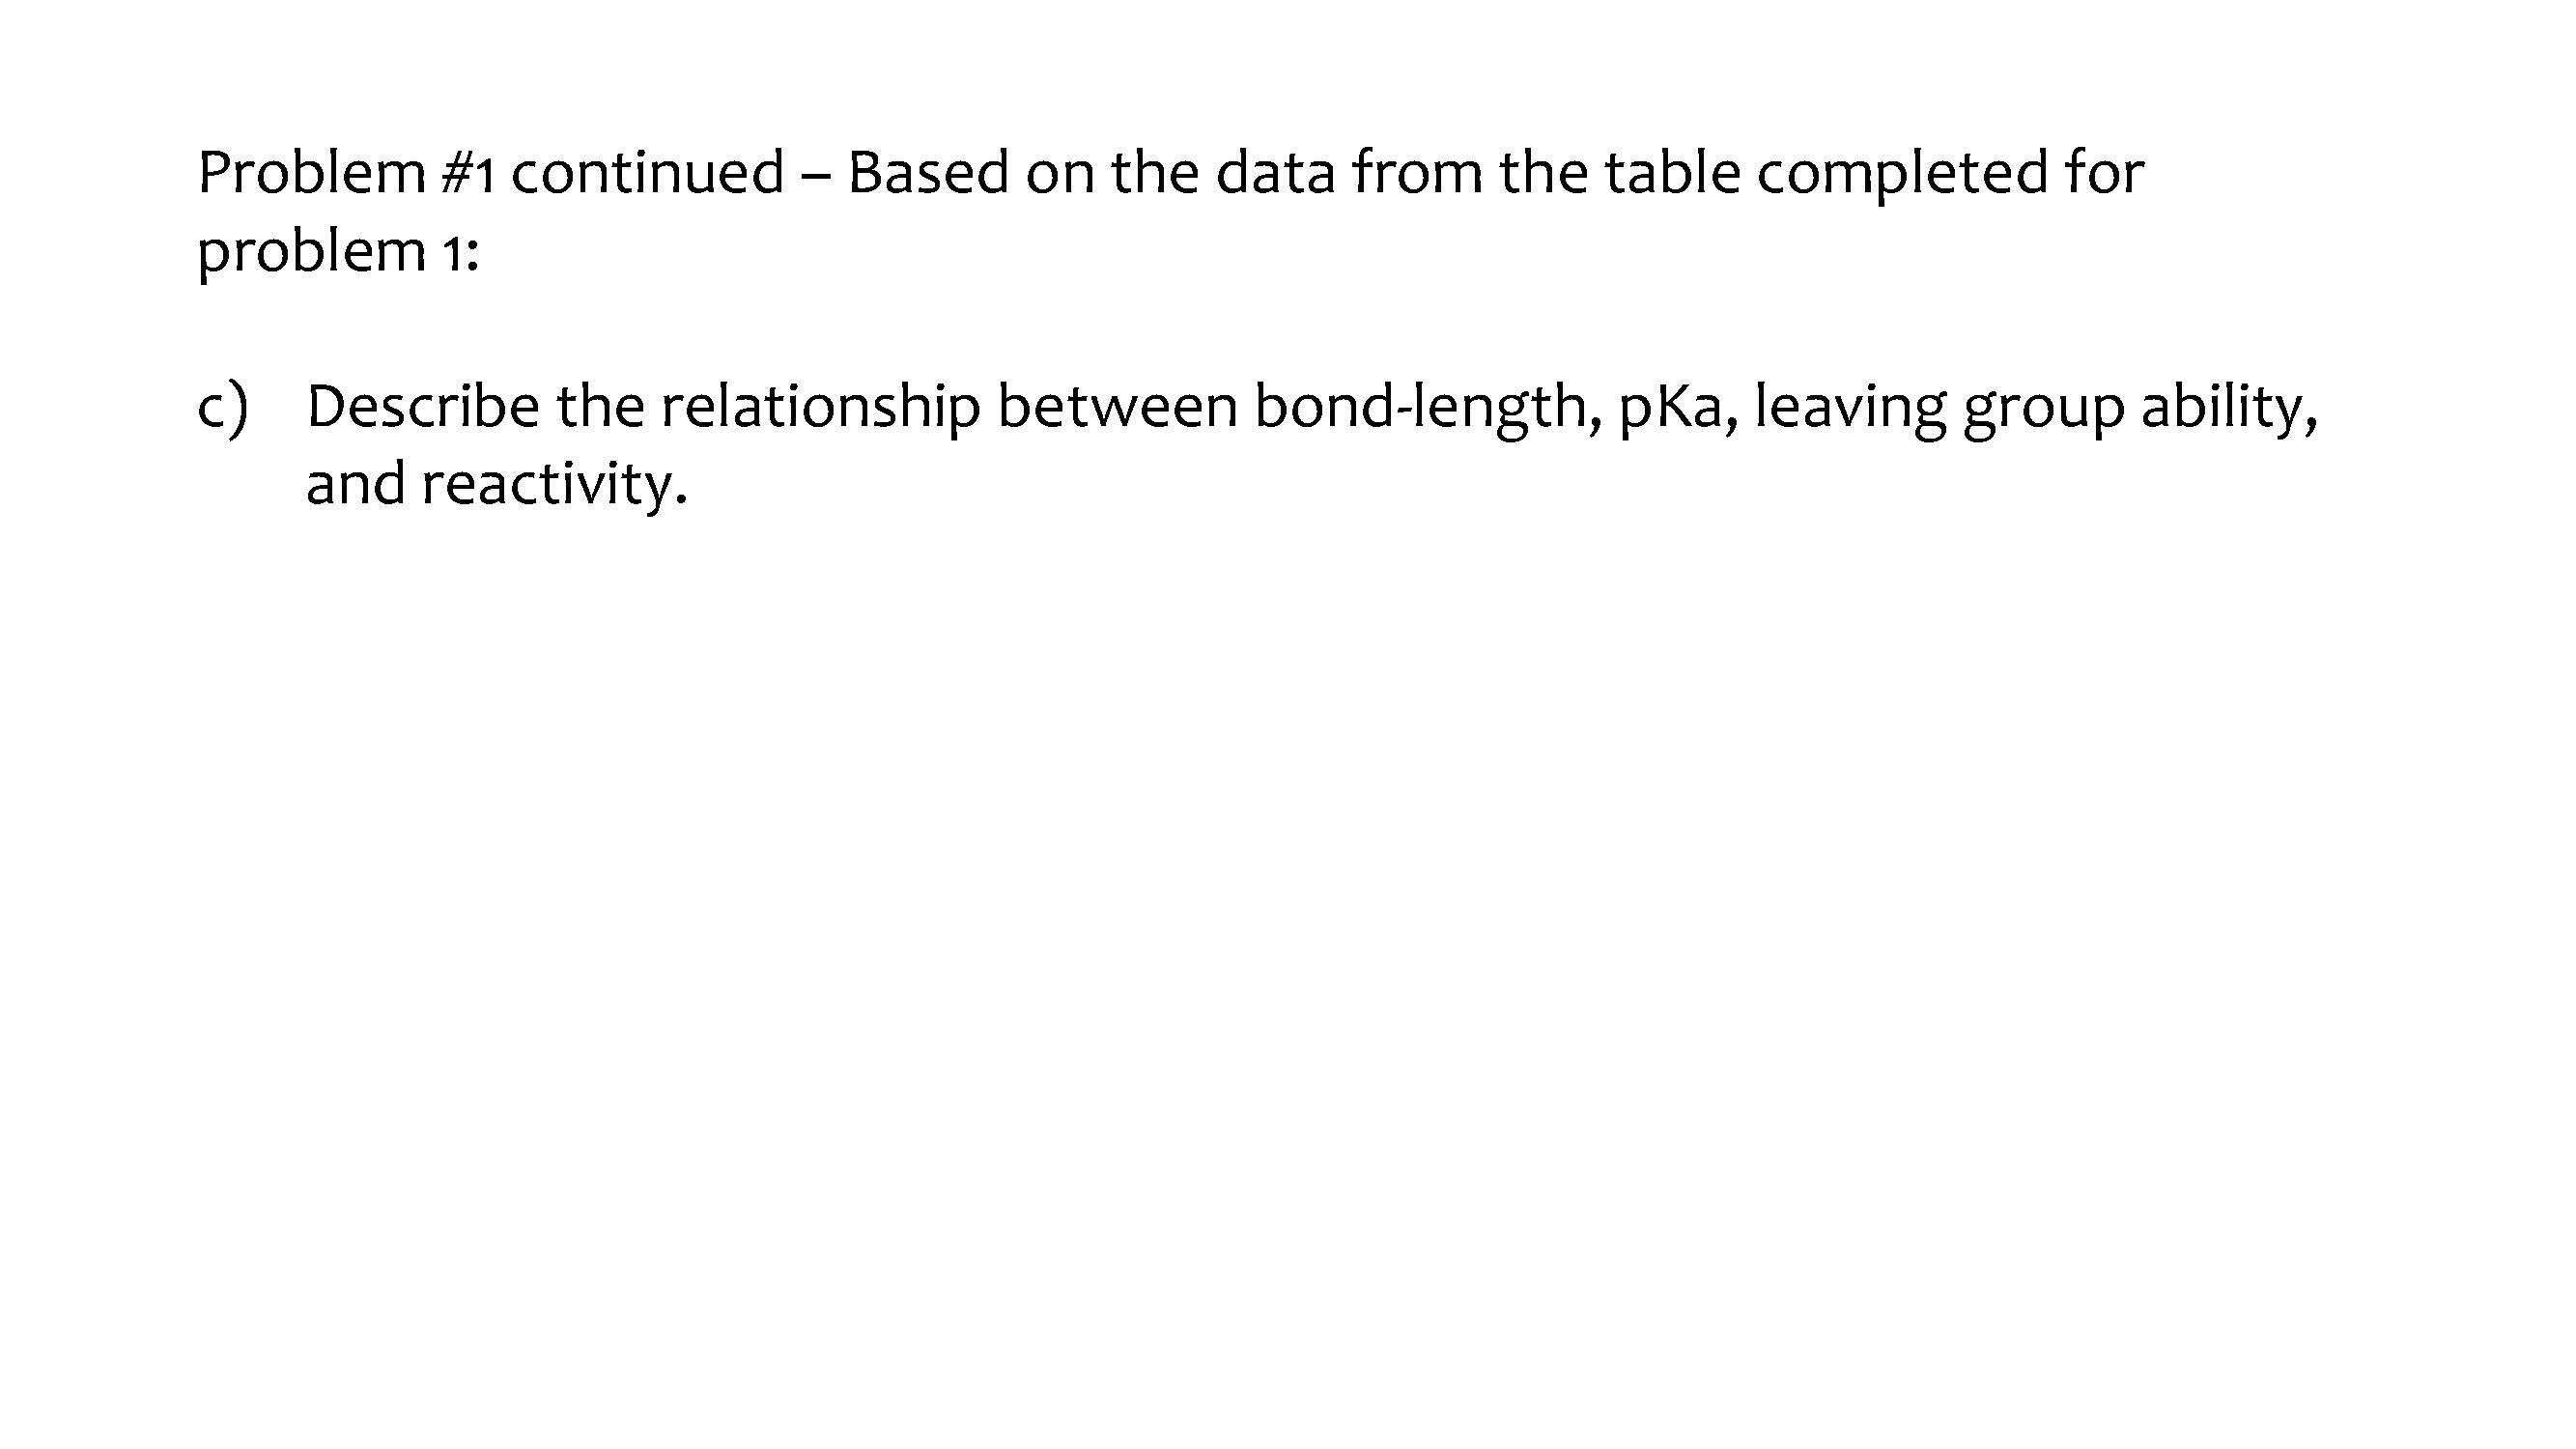


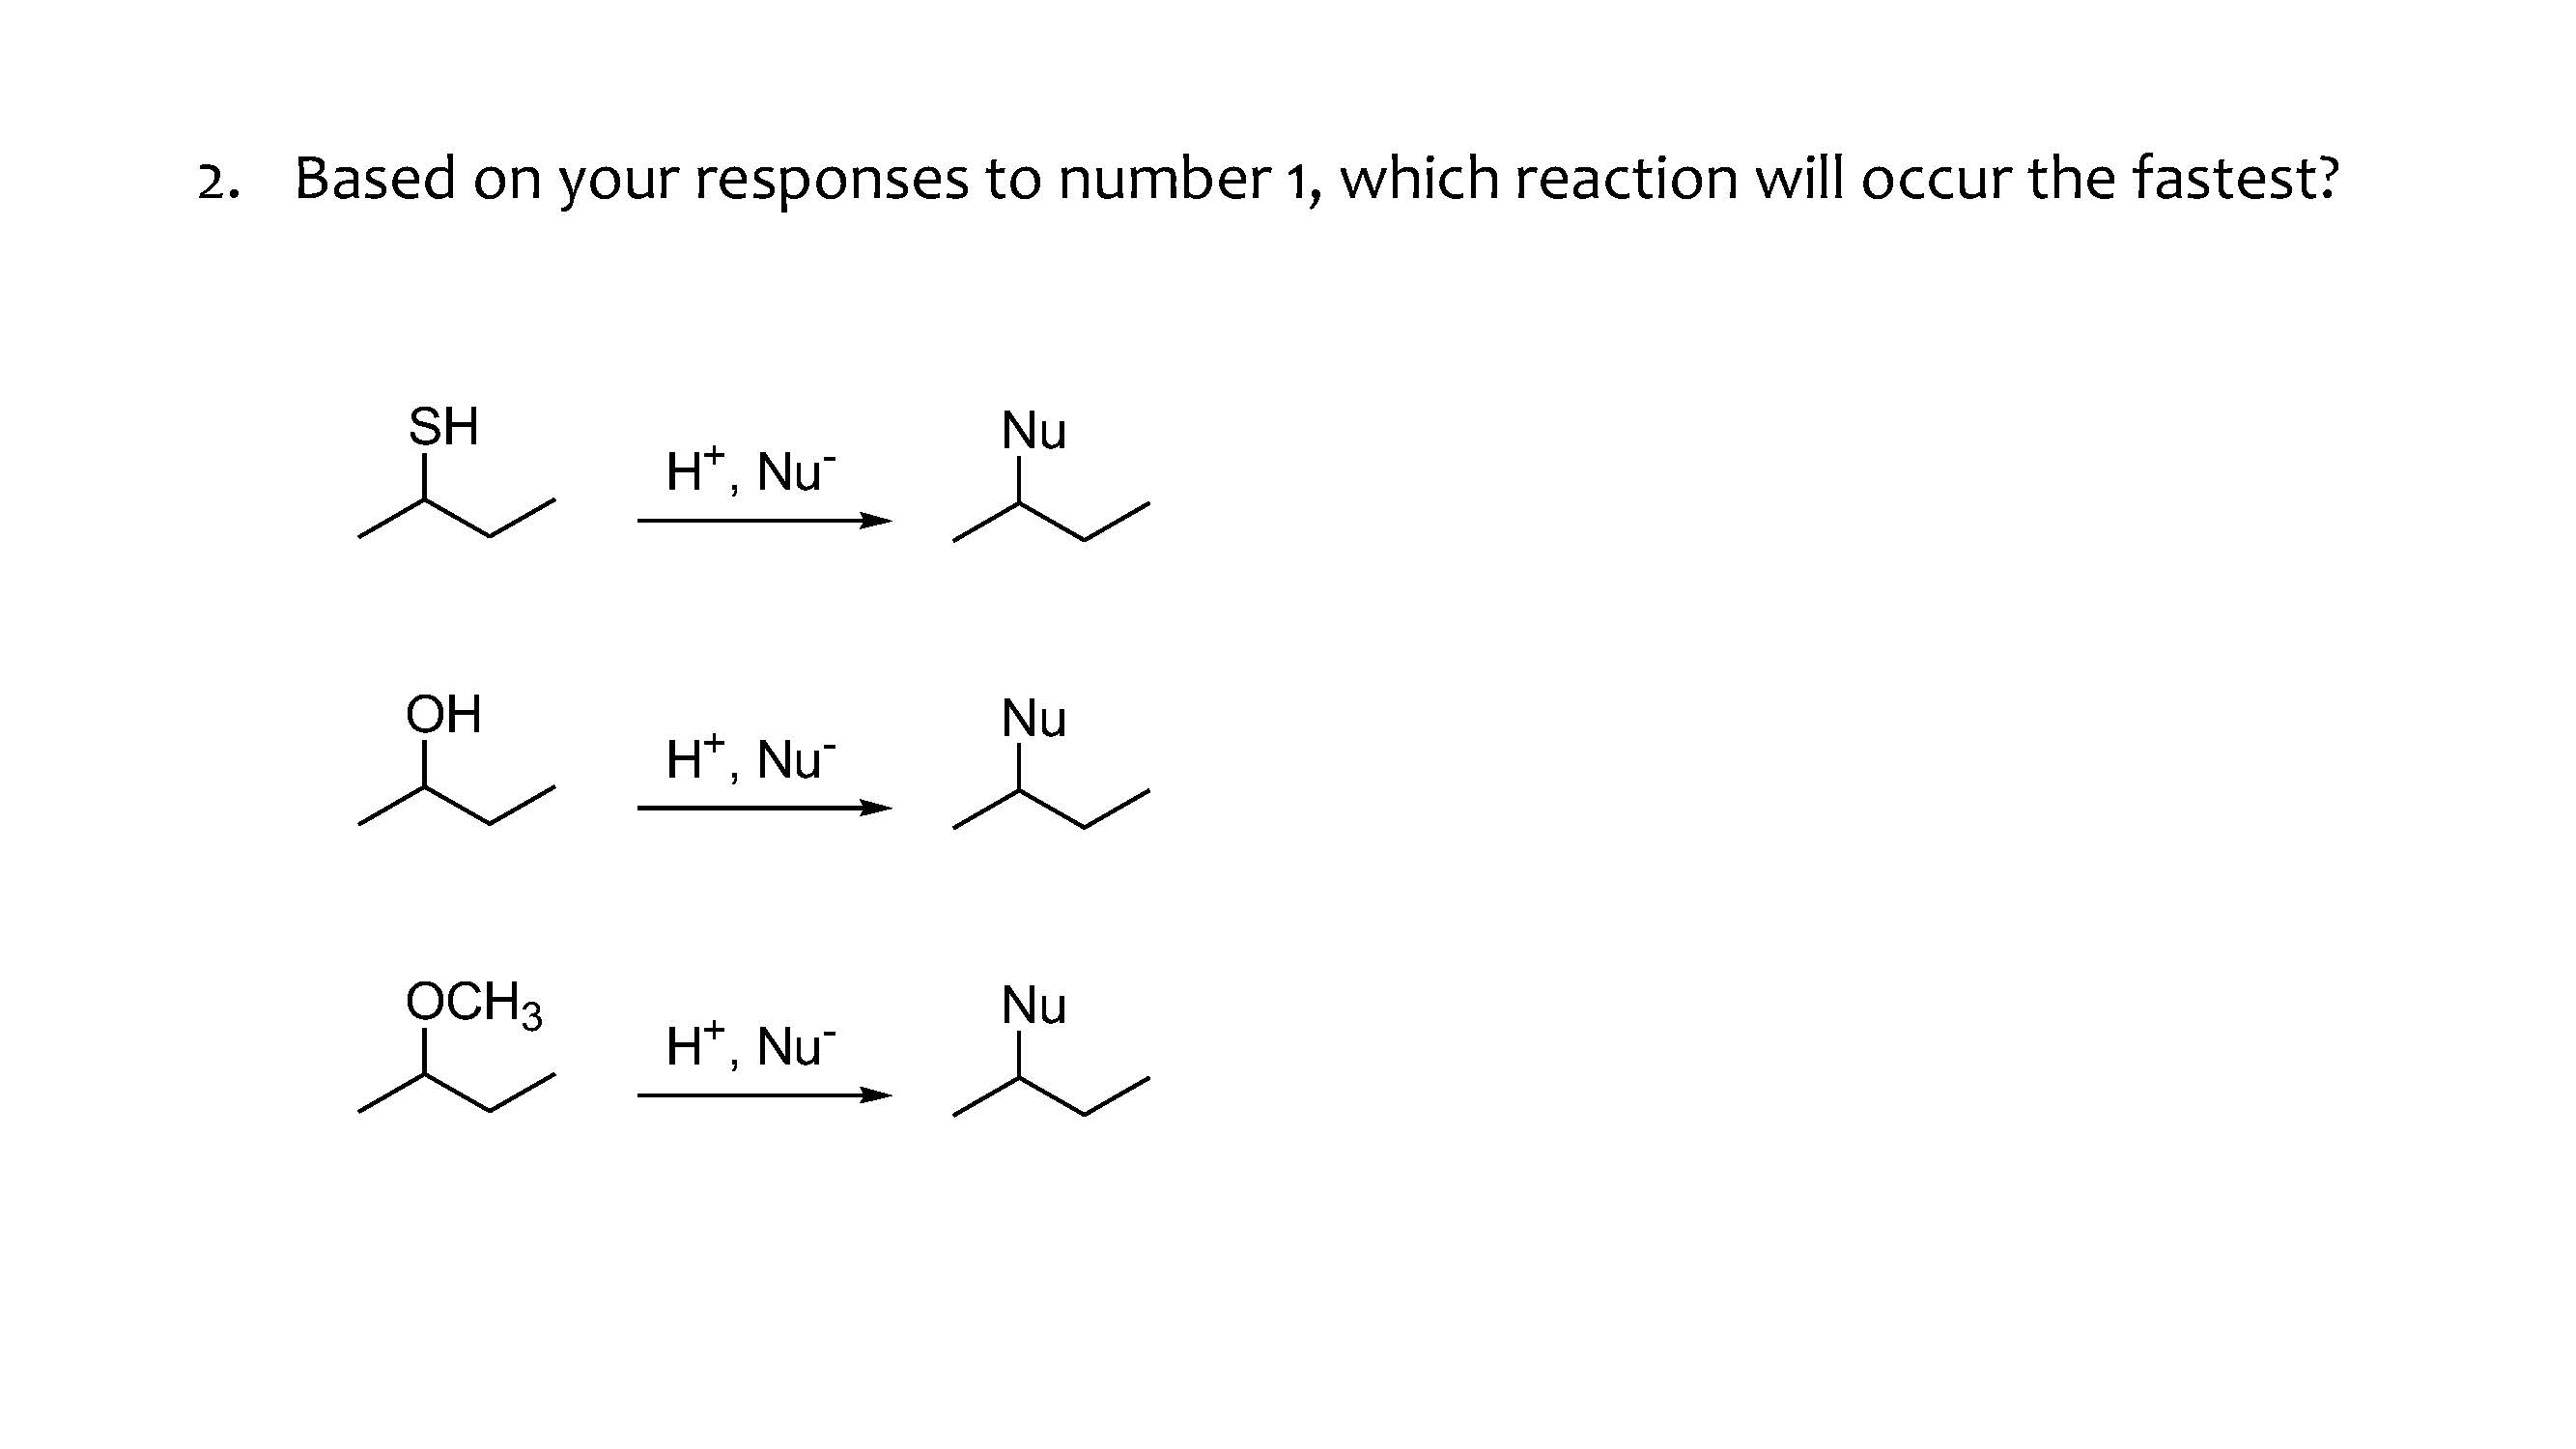

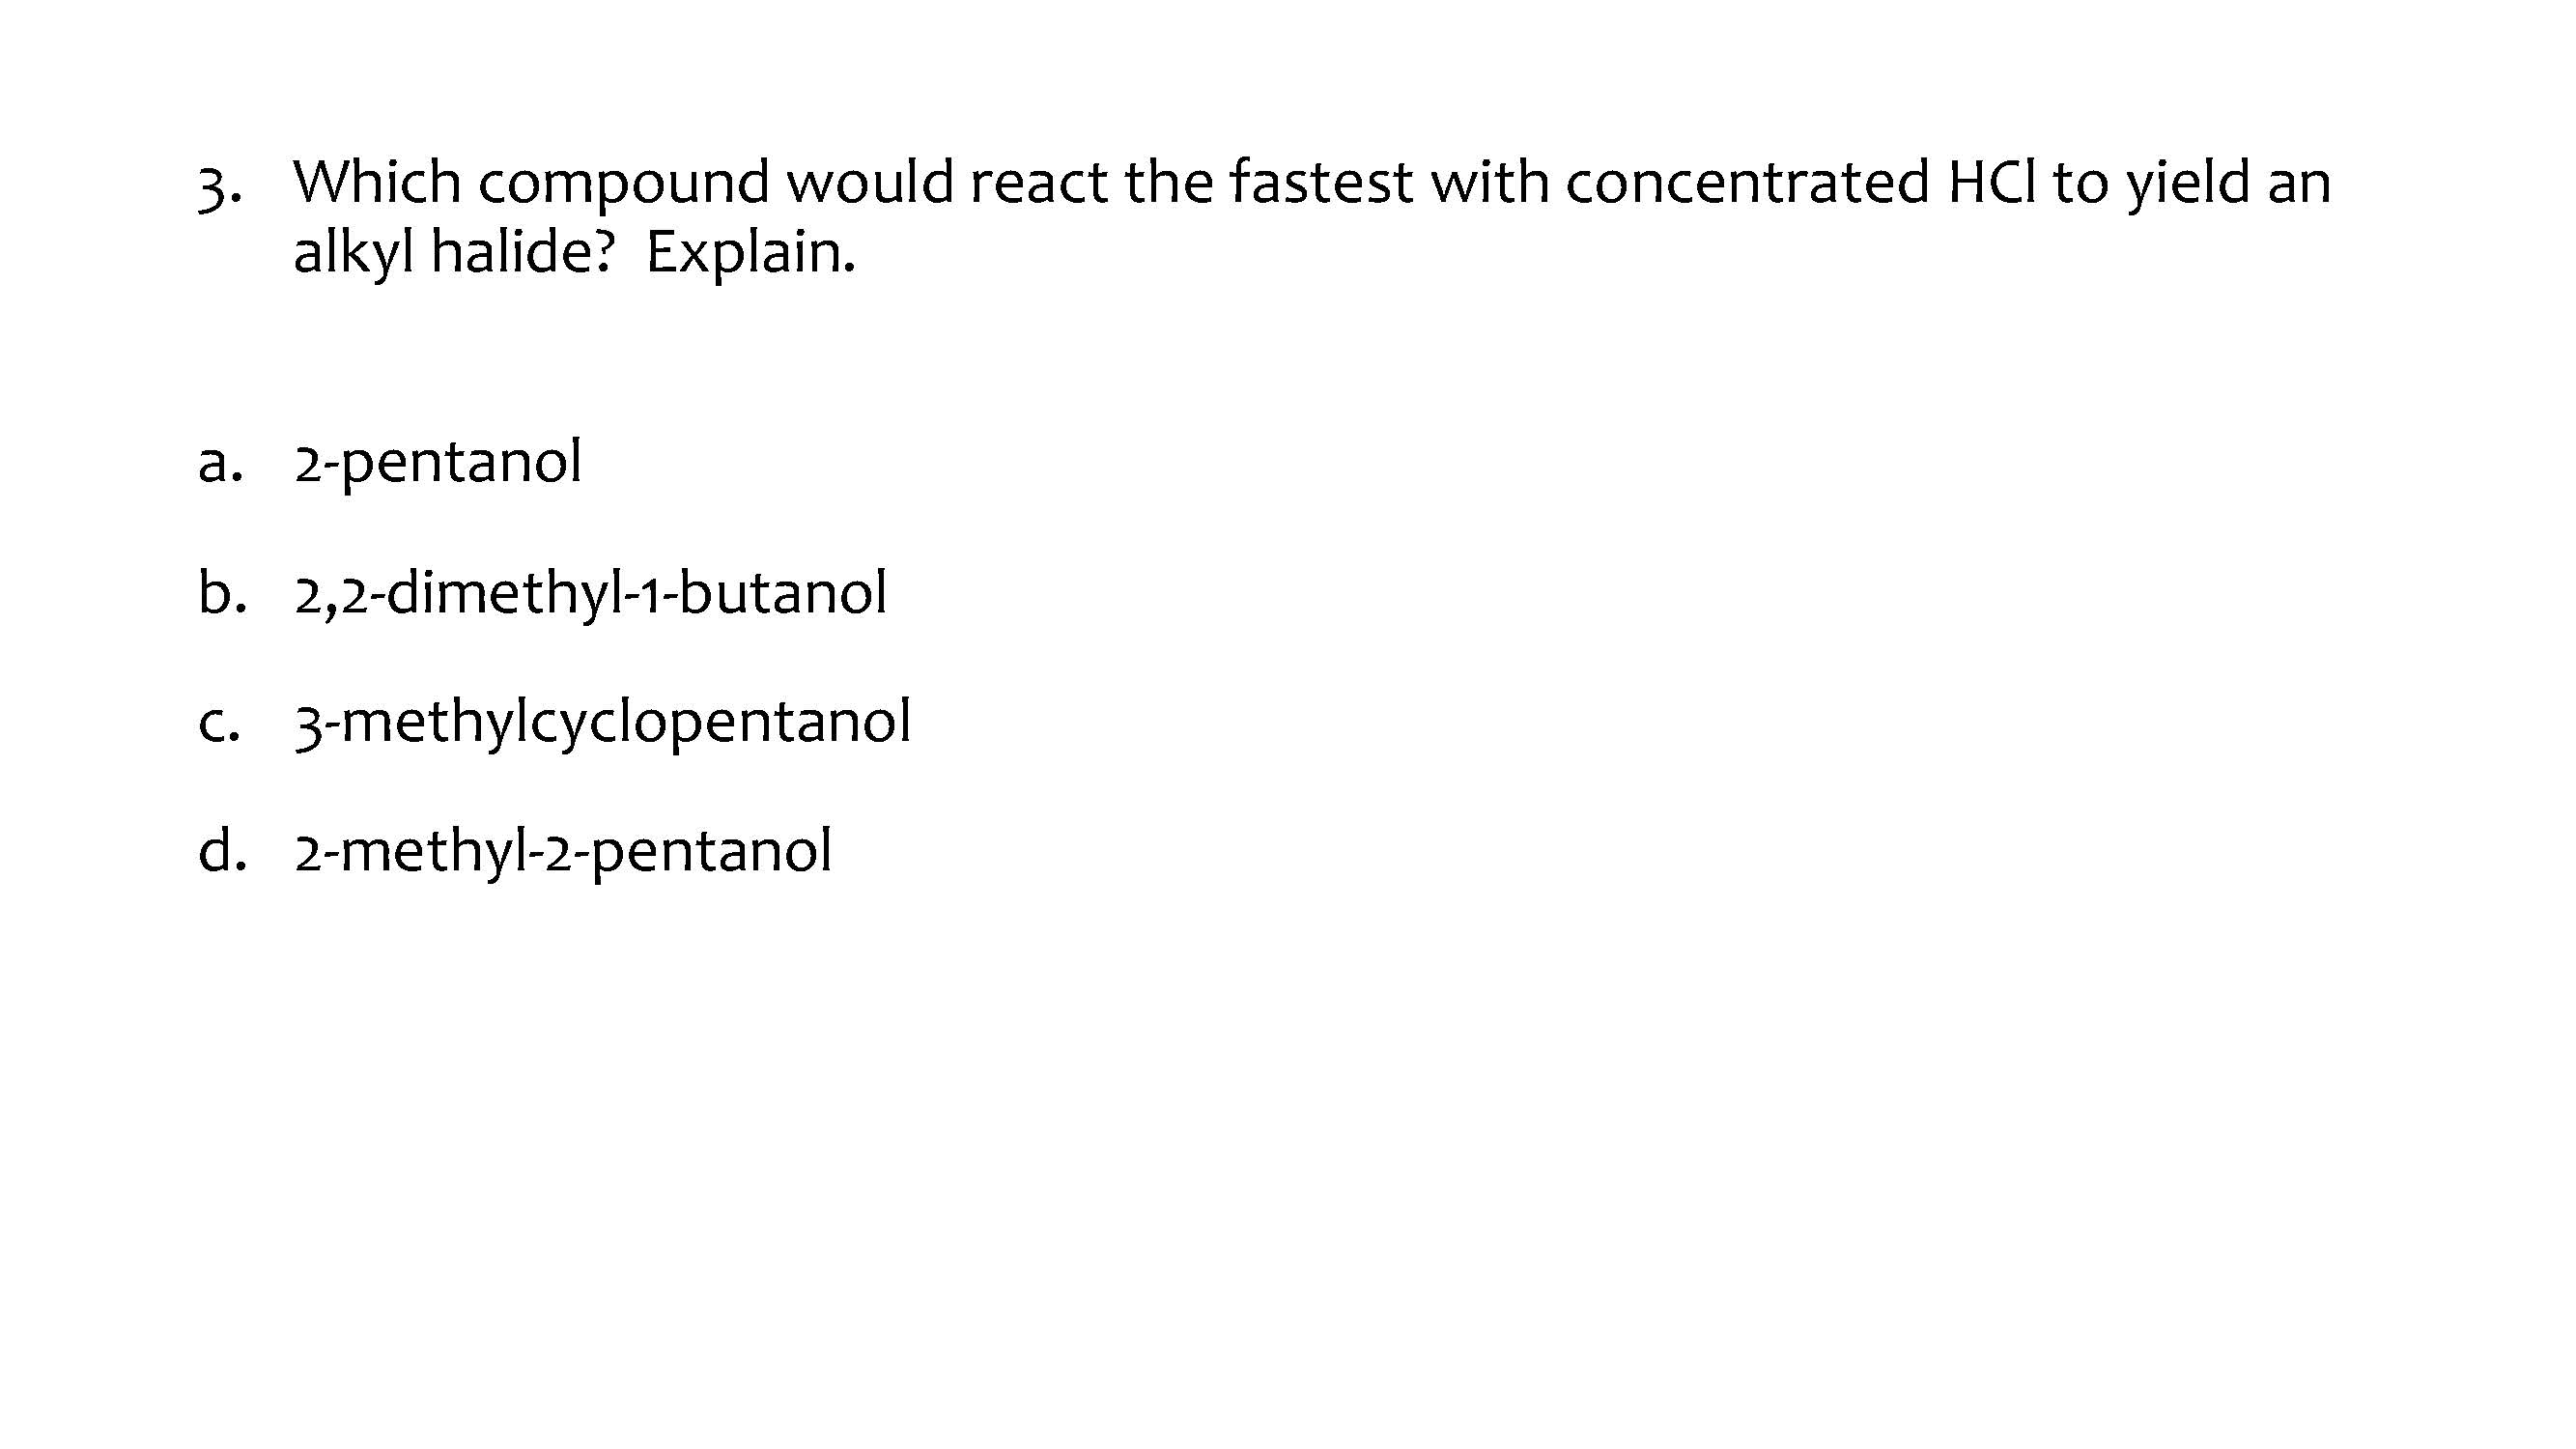


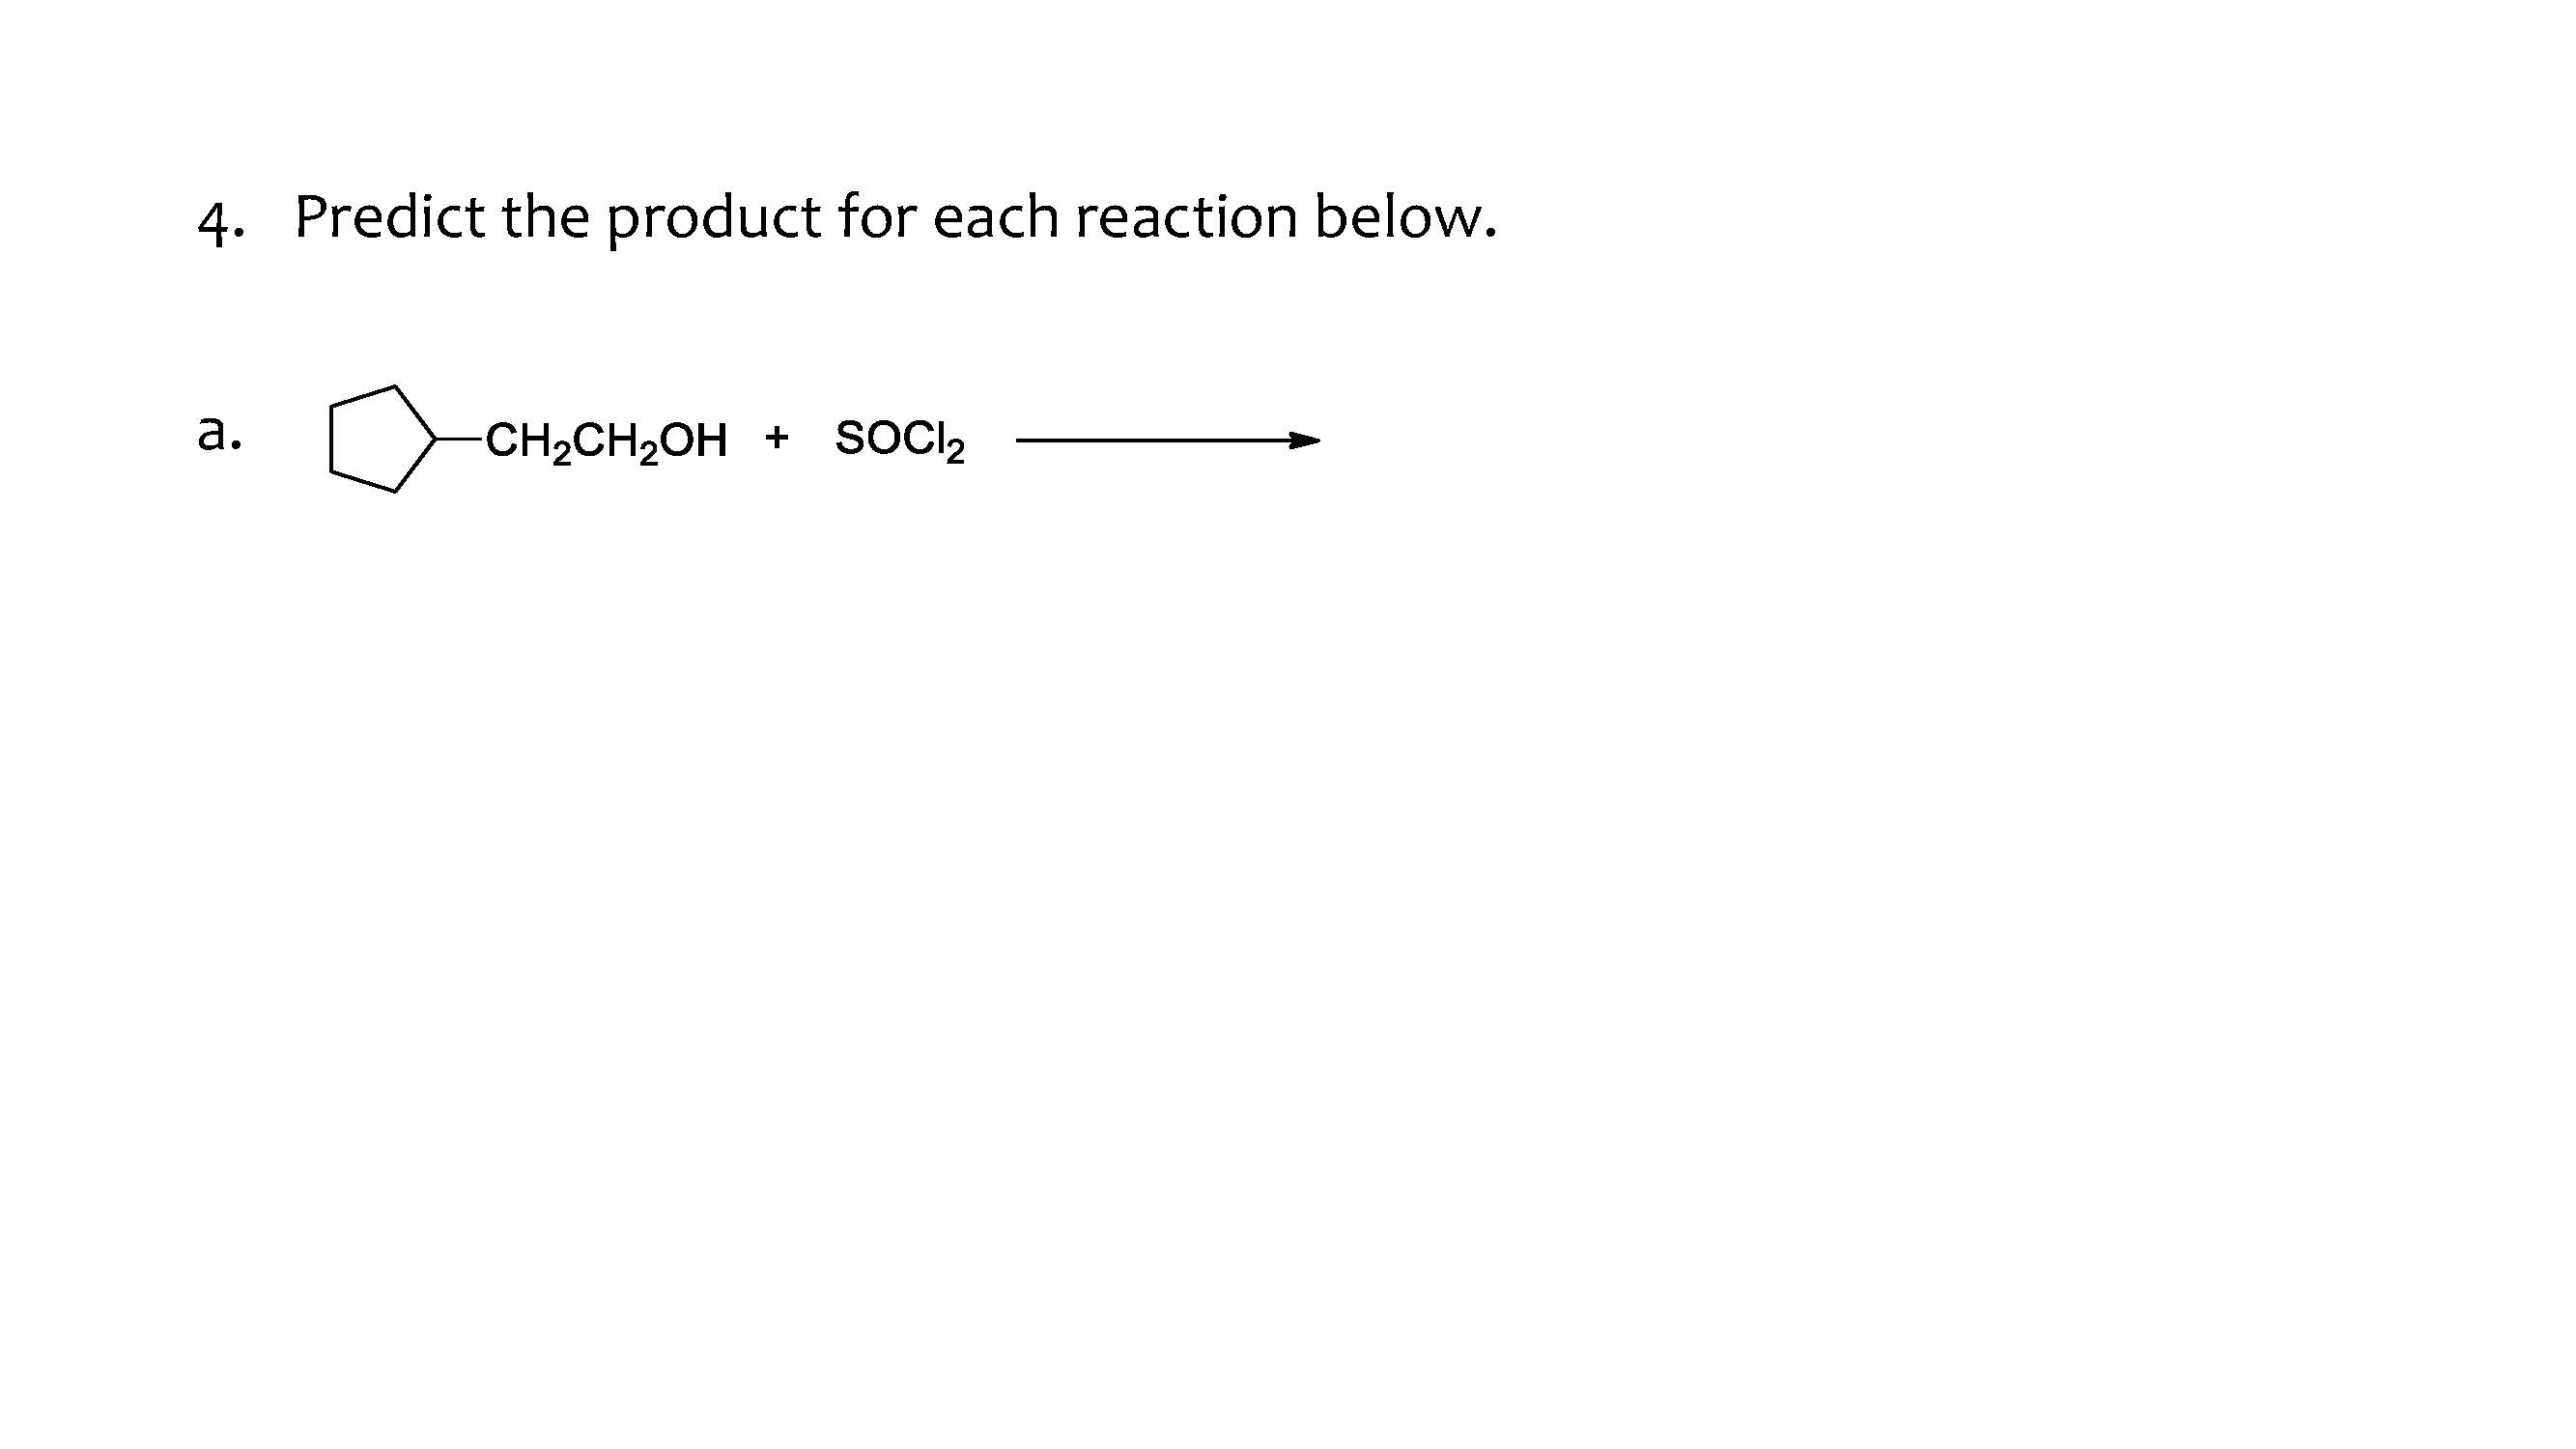

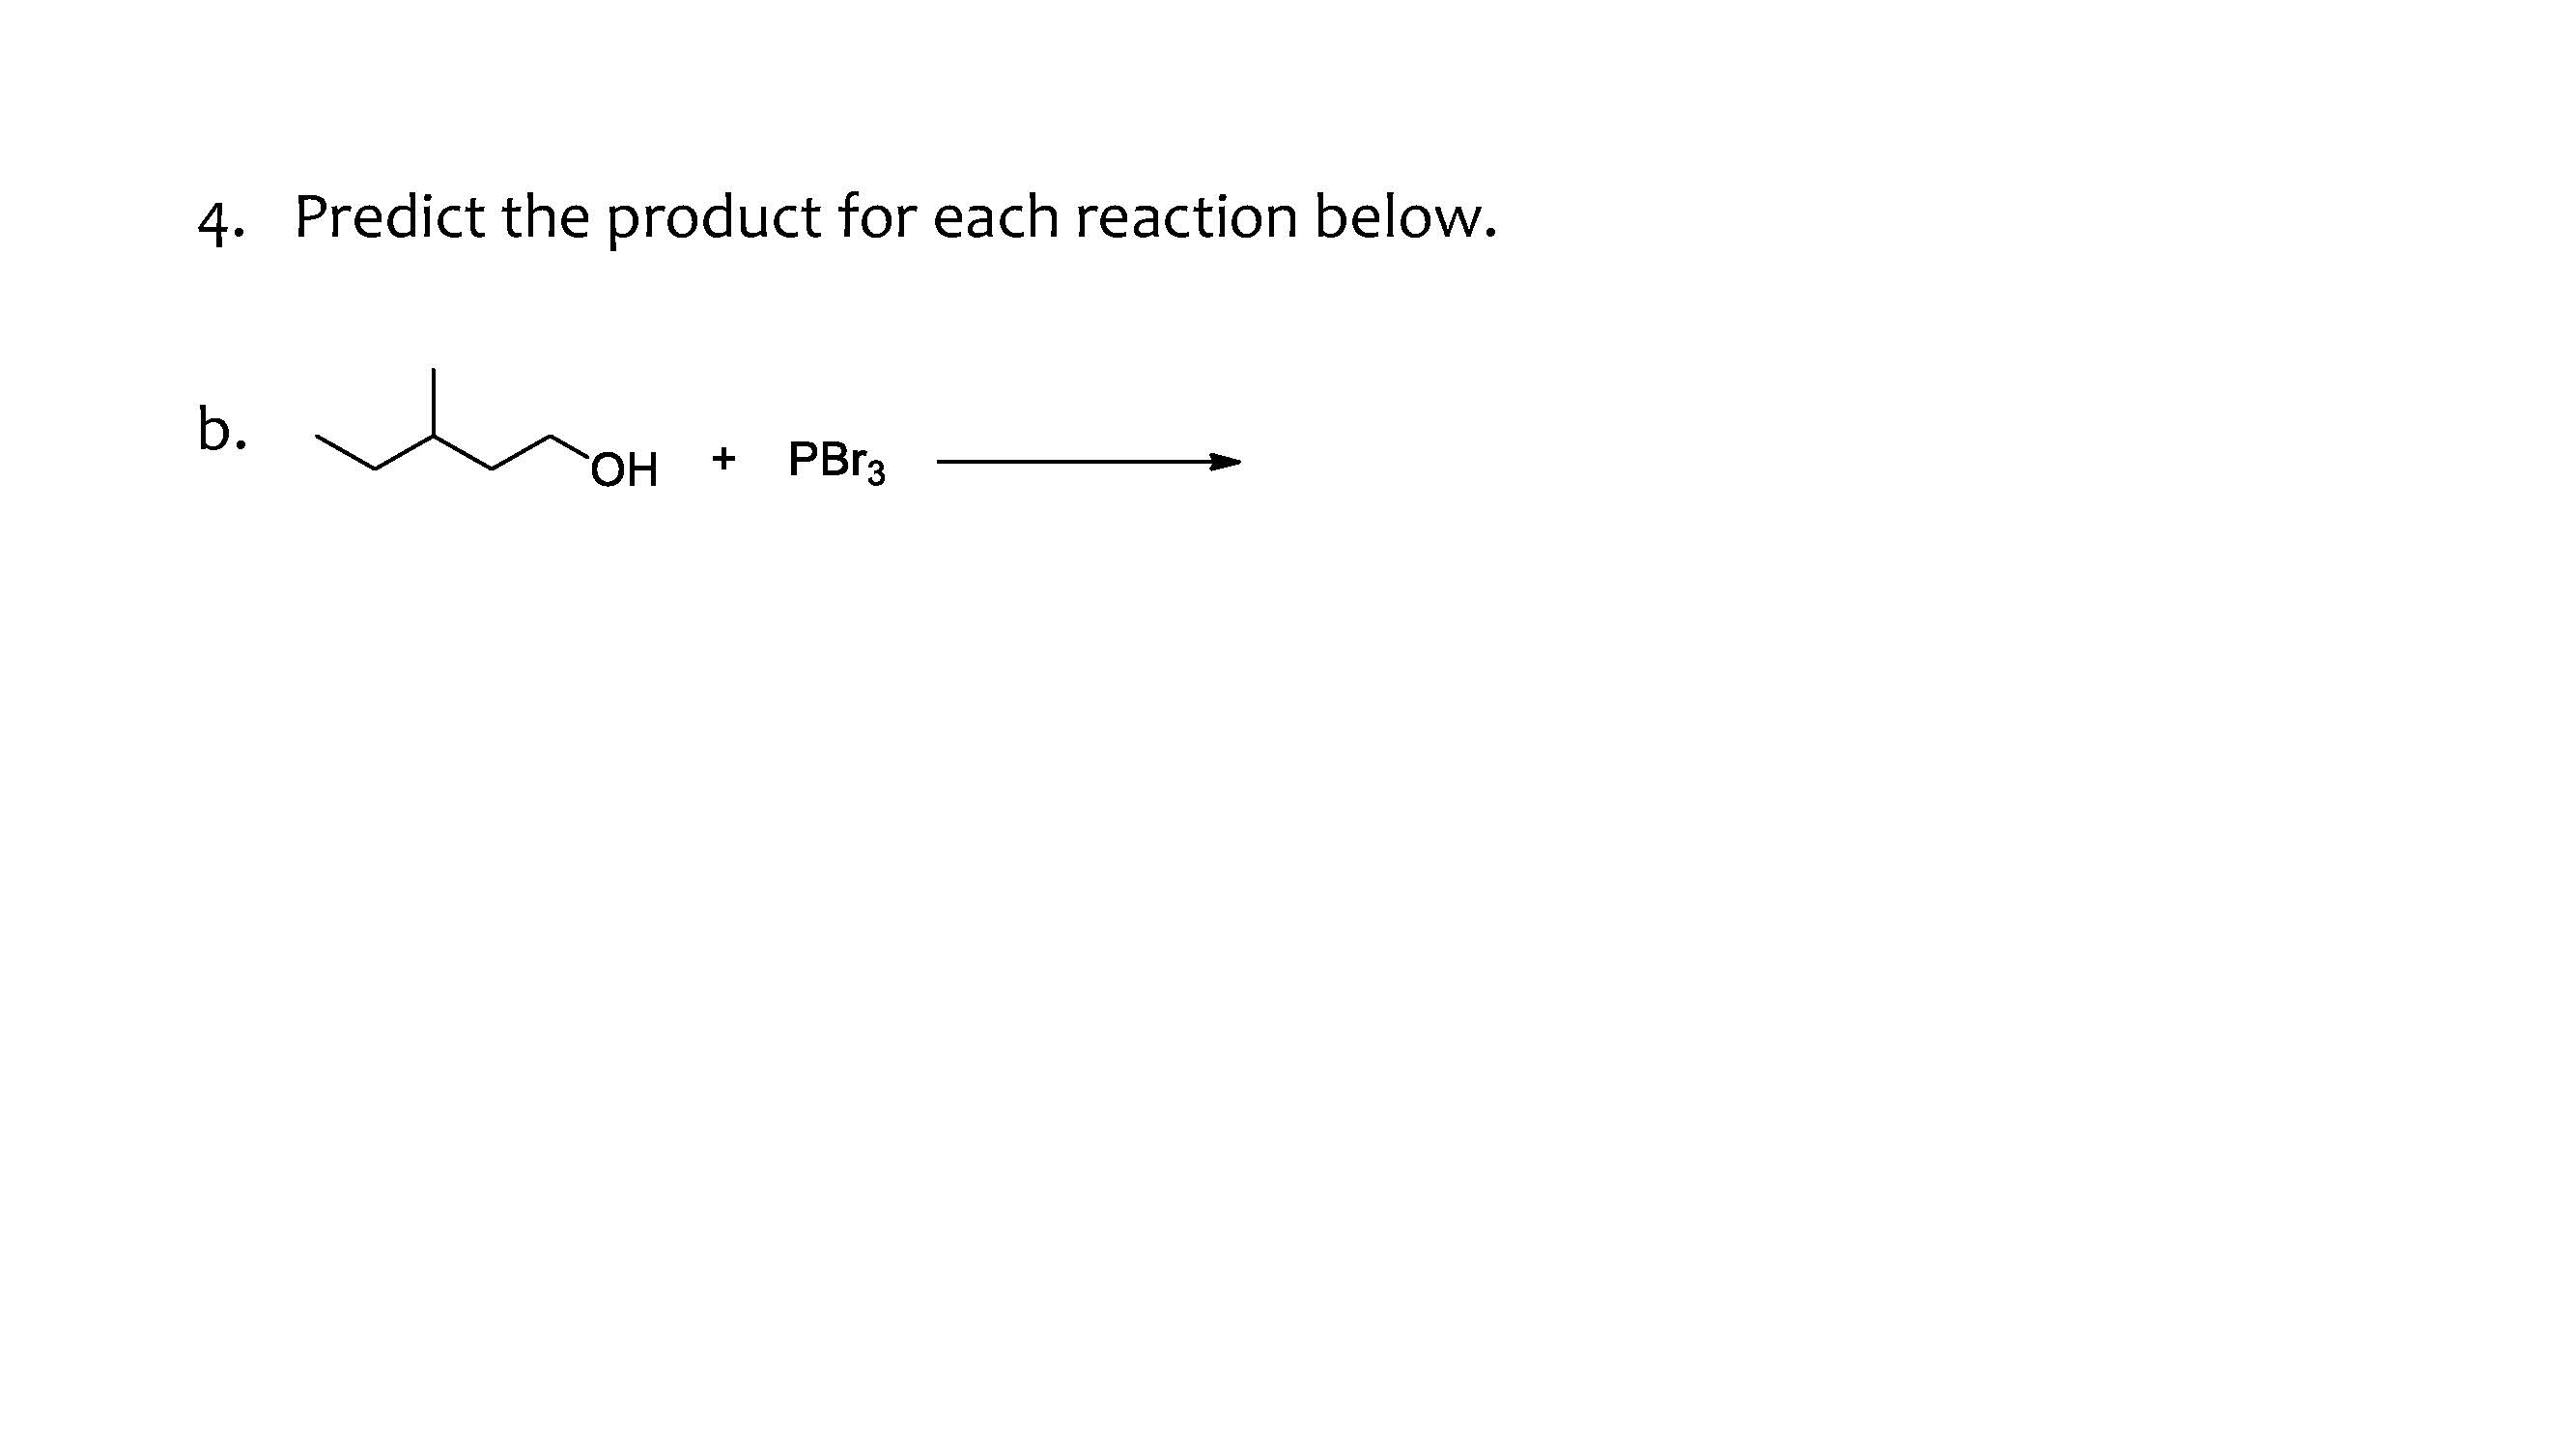


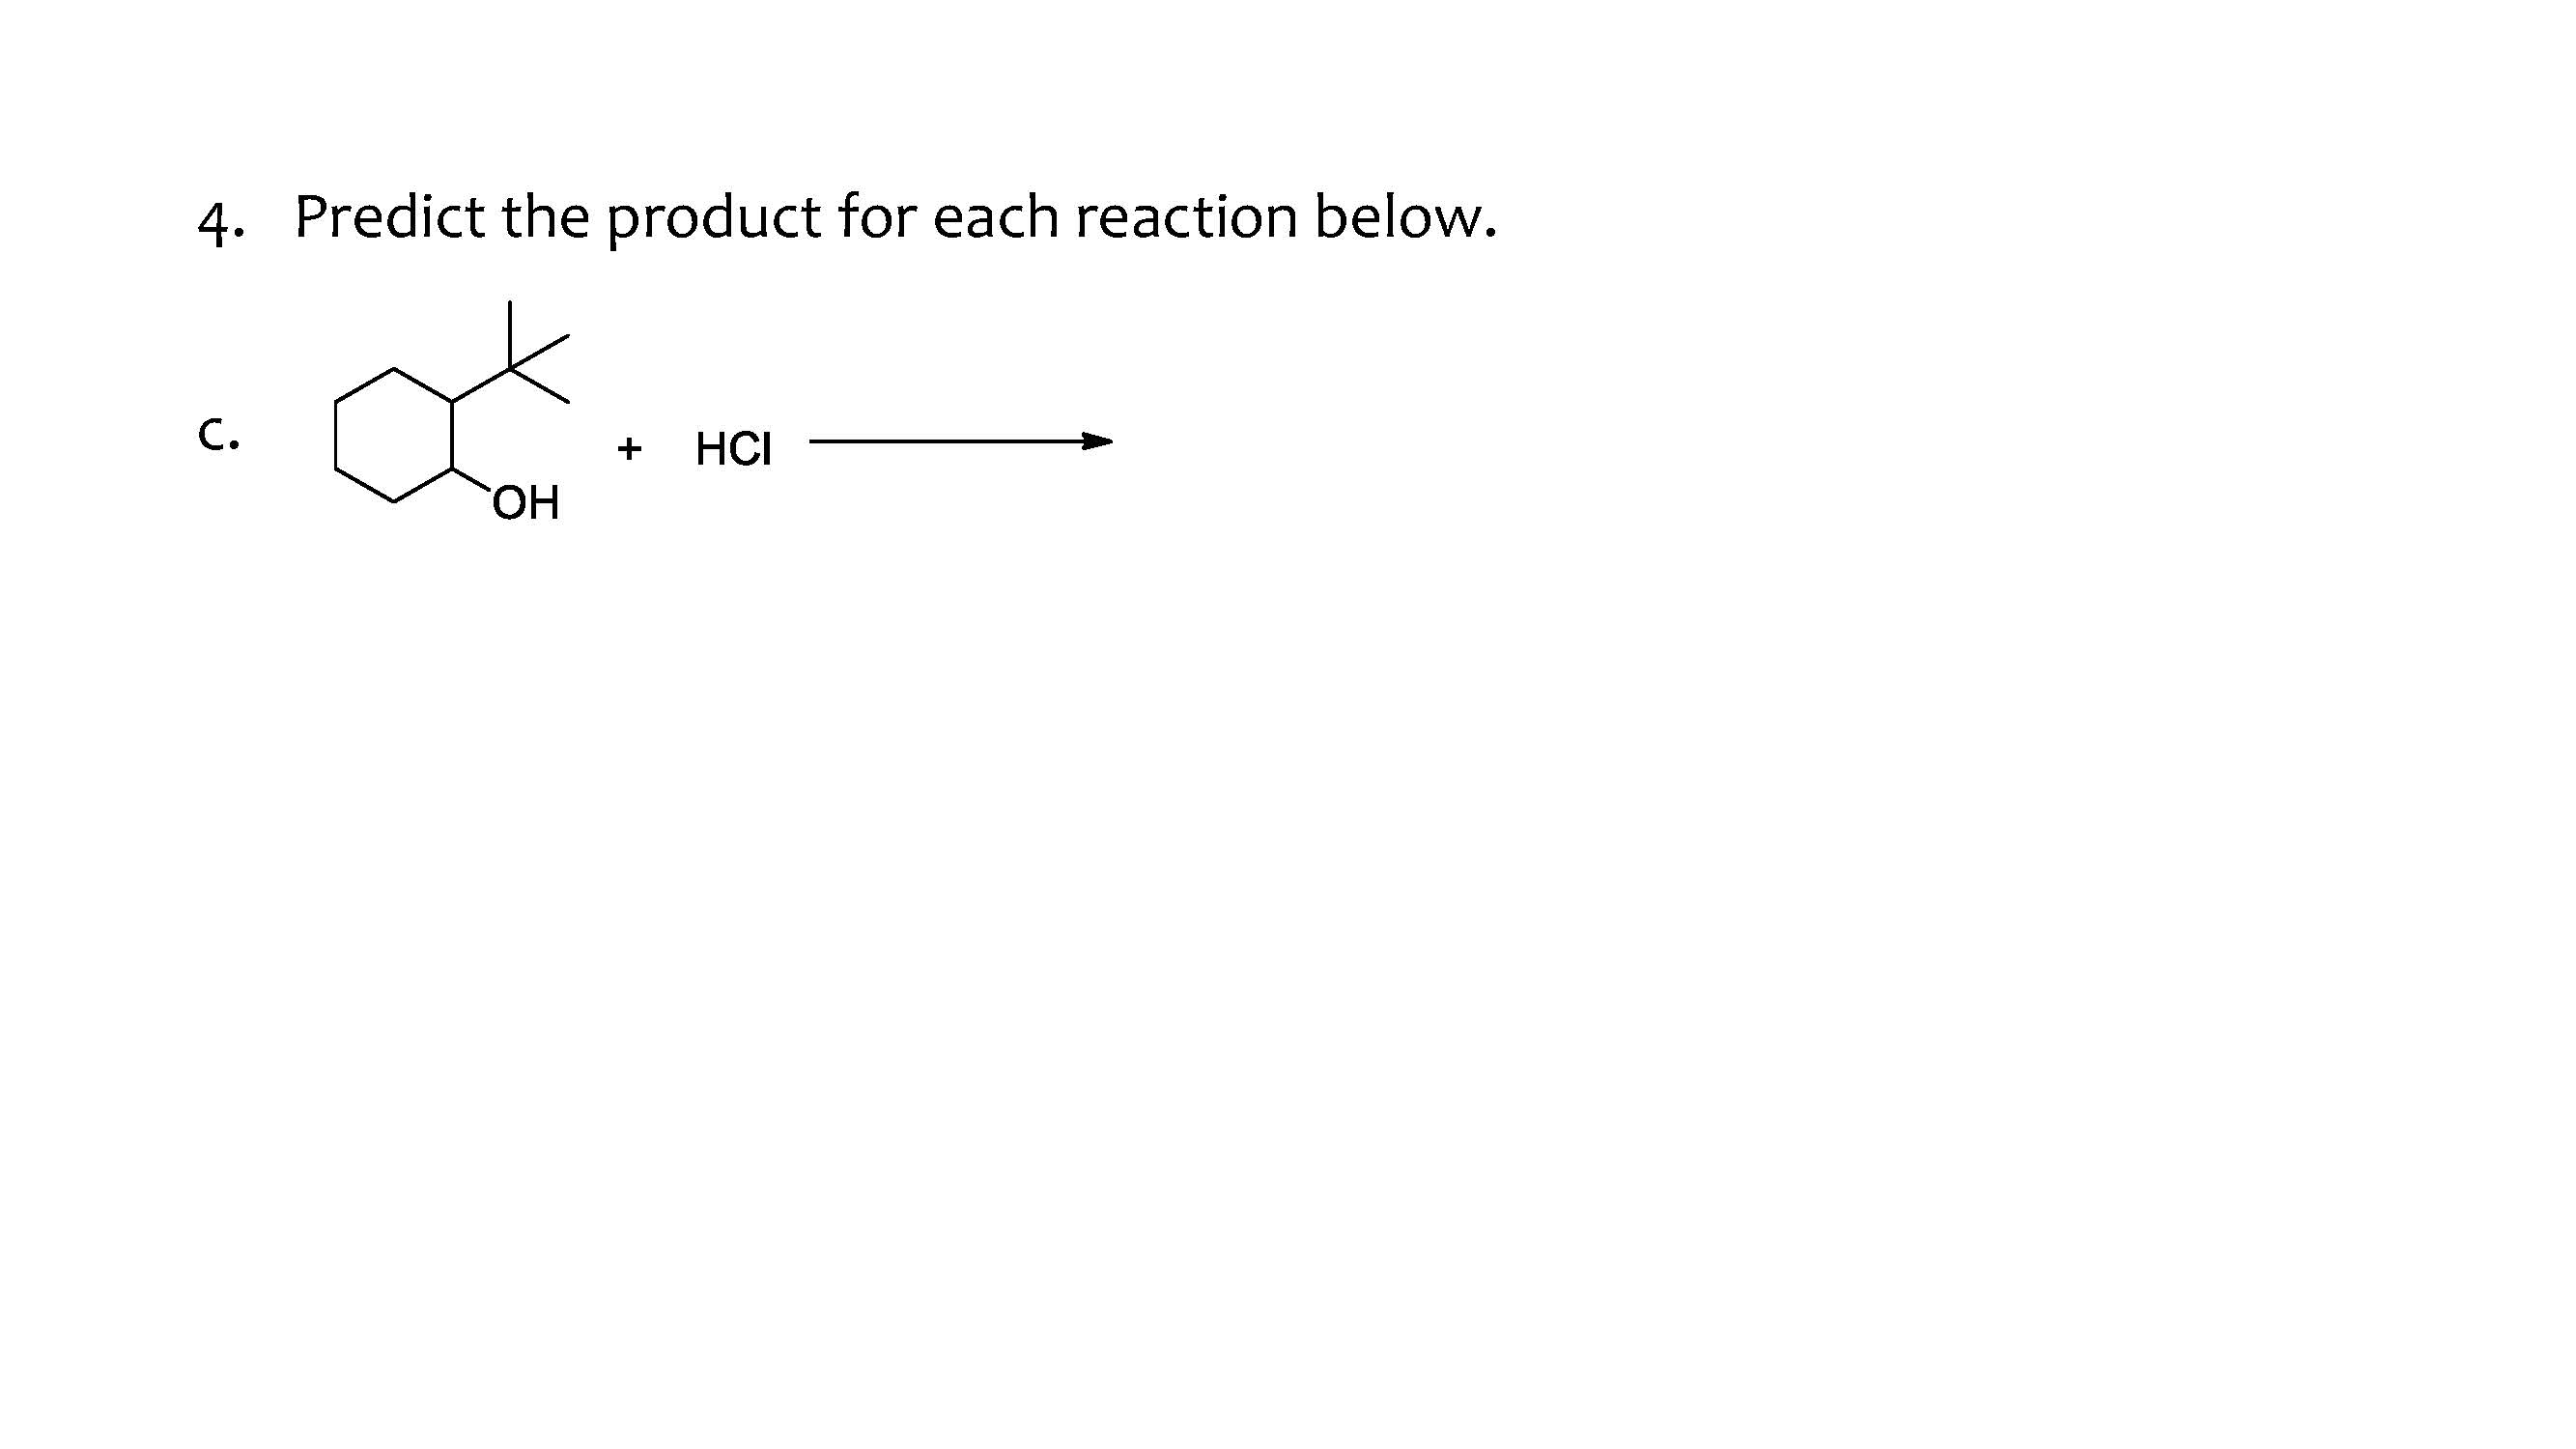

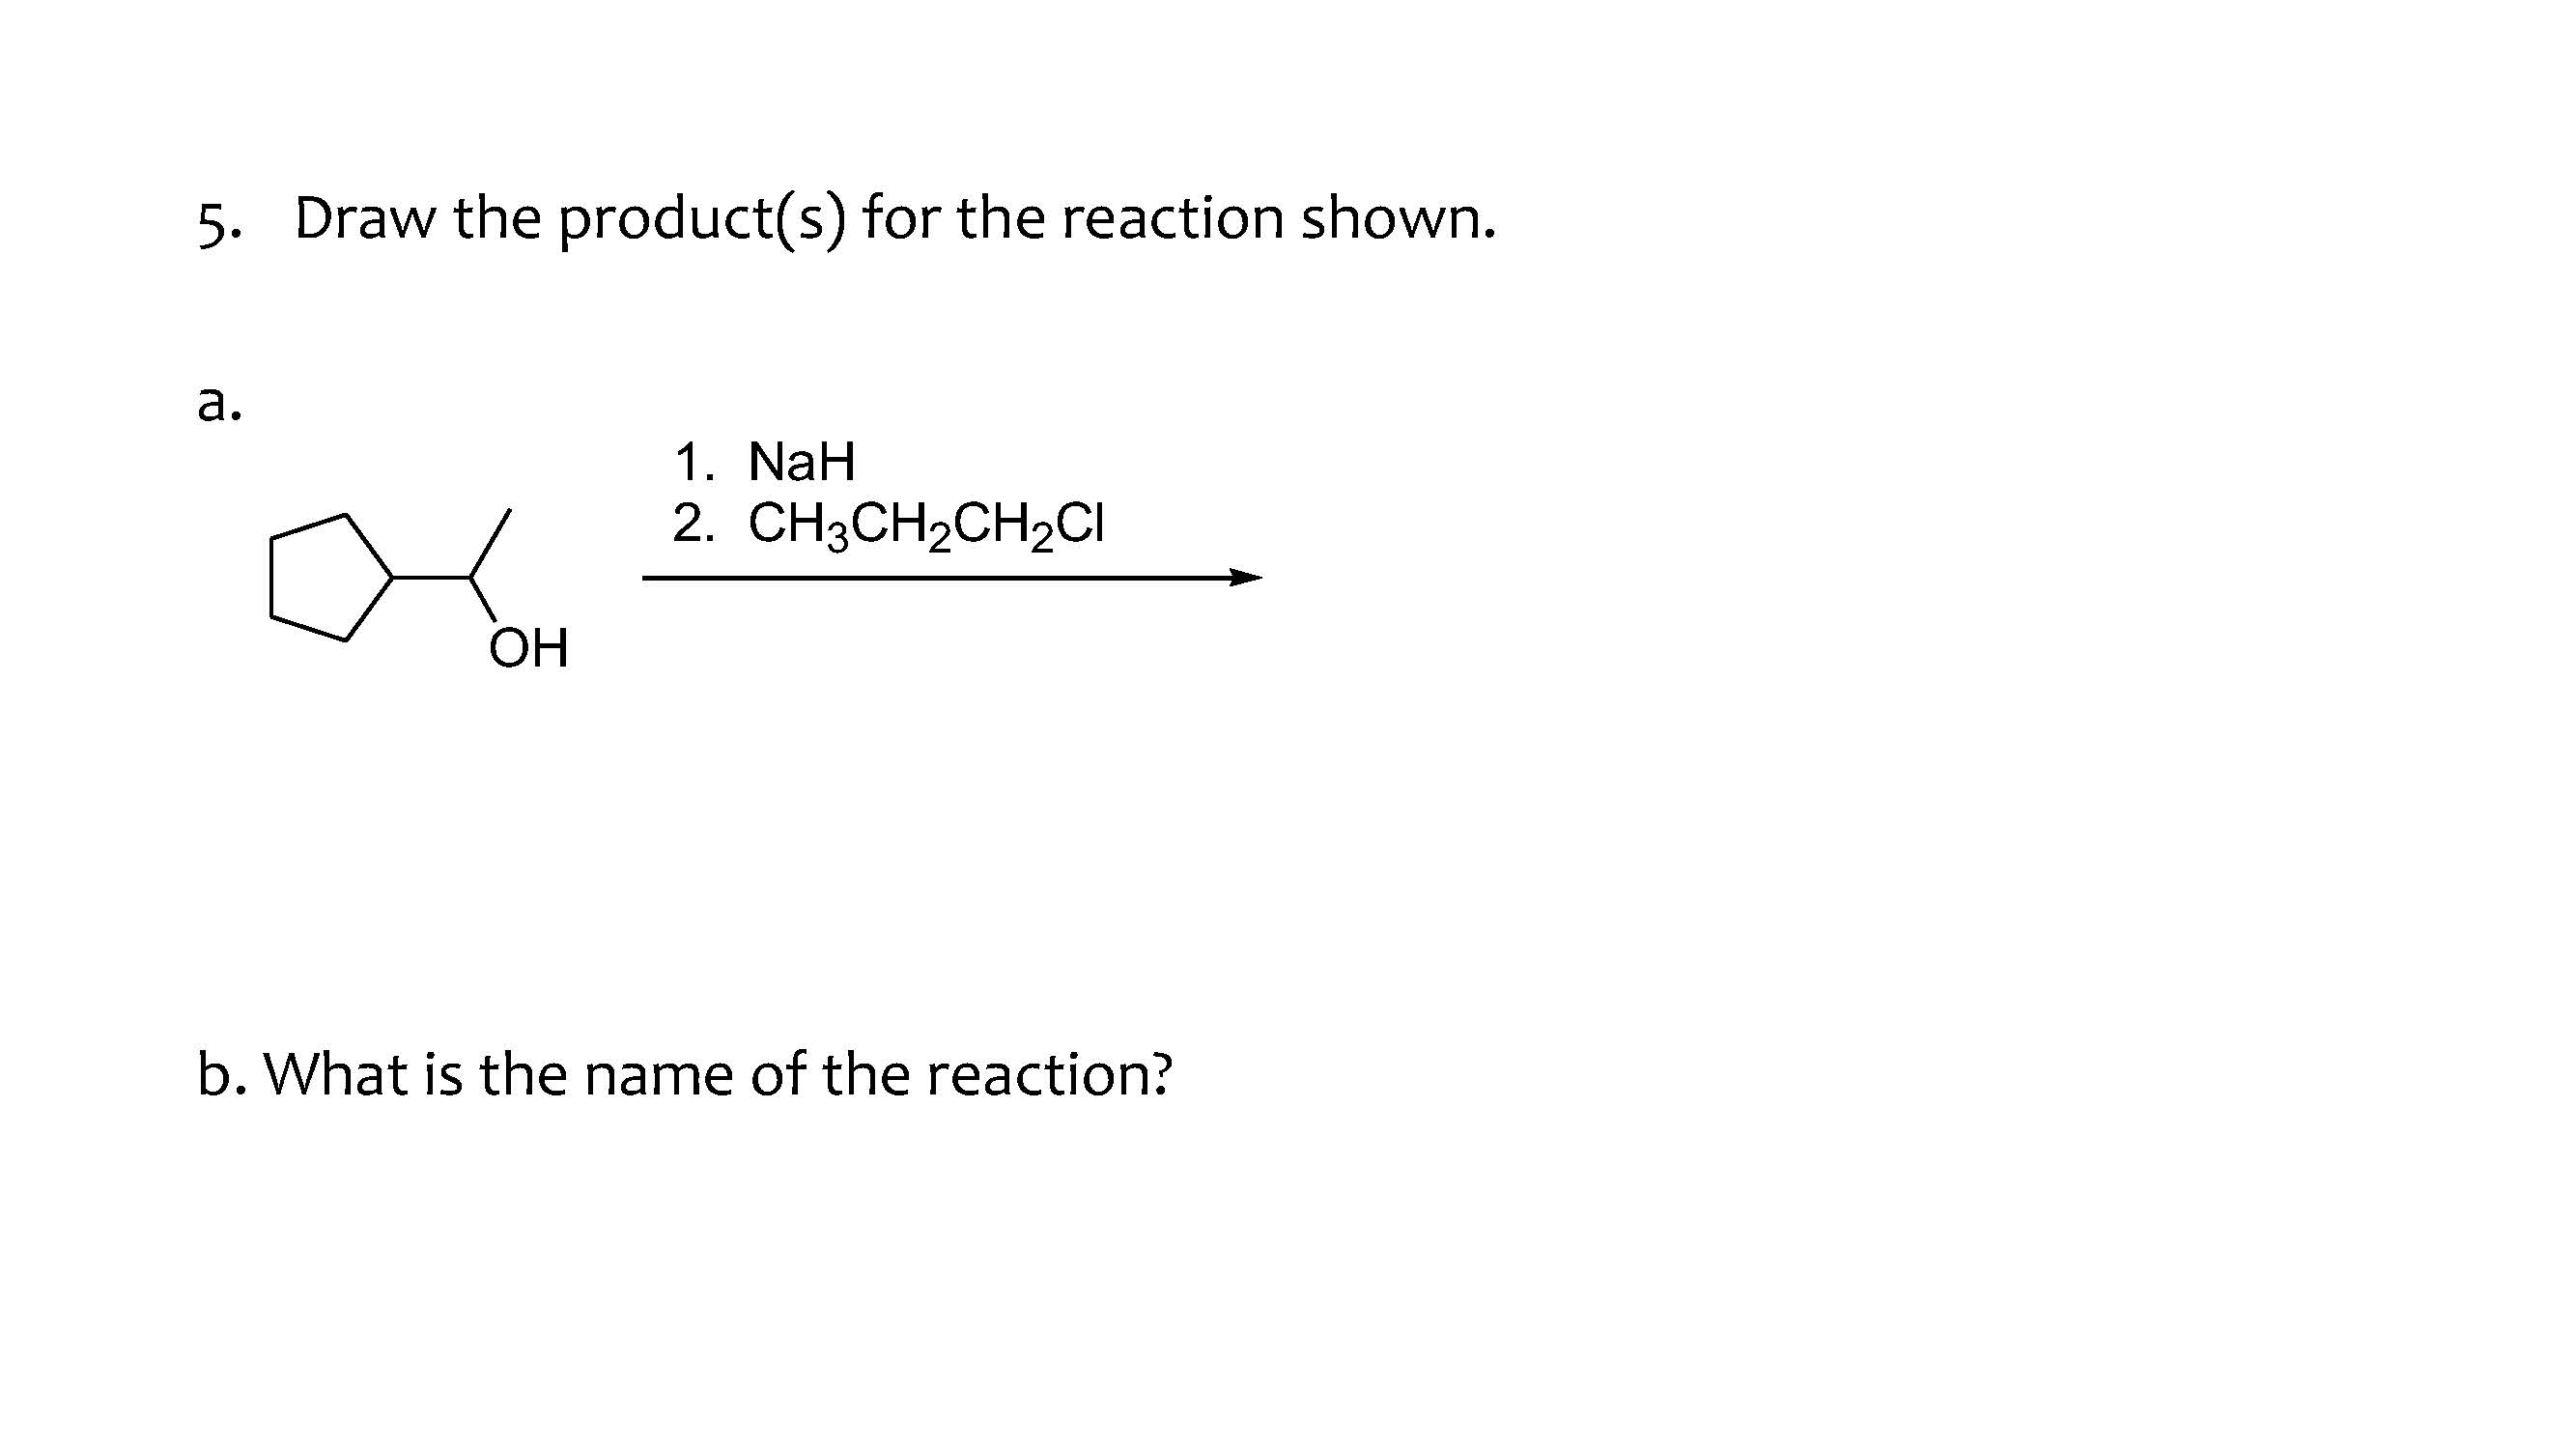


***Figure S2. All prompts for group quiz 3***
